# Supplementary material for: Cannabidiol Regulates Gene Expression in Encephalitogenic T cells Using Histone Methylation and noncoding RNA during Experimental Autoimmune Encephalomyelitis
Source: Sci Rep. 2019 Oct 31;9:15780. doi: 10.1038/s41598-019-52362-8 (PMC6823430; doi:10.1038/s41598-019-52362-8)
Supplement: Supplementary file 1 — Dataset1 [file 41598_2019_52362_MOESM1_ESM.xlsx]

## Sheet: Sheet2
Yang et al “Cannabidiol Regulates Gene Expression in Encephalitogenic T cells Using Epigenetic Pathways during Experimental Autoimmune Encephalomyelitis”
Altered noncoding RNA (Fold change >1.5)
Gene Symbol	MOG+CBD	MOG+Veh	NAÏVE	CBD-MOG	MOG-NAÏVE	CBD-NAÏVE	Fold chang(CBD-MOG)	Fold change (MOG-Naïve)	Fold change(CBD-Naïve)
Gm23722	6.92841	11.982	8.8684	-5.05363	3.11364	-1.93999	-33.2119	8.65566	-3.83702
Gm16439	8.04545	12.2424	7.25215	-4.19691	4.99021	0.793297	-18.3399	31.7836	1.73303
Gm5970	9.98305	13.7485	5.11407	-3.76546	8.63444	4.86897	-13.5993	397.397	29.2218
Gdap10	8.58985	12.3004	7.90982	-3.71059	4.39062	0.680033	-13.0918	20.9753	1.60218
AW112010	10.7346	14.4093	11.1126	-3.67472	3.29674	-0.37798	-12.7703	9.82692	-1.29952
Gm5537	13.0826	16.6033	12.4332	-3.52078	4.17012	0.64934	-11.4778	18.0024	1.56845
Pgk1-rs7	12.8451	16.1462	12.1944	-3.30109	3.95175	0.65066	-9.8566	15.4737	1.56989
Gm17024	7.0312	10.3237	6.96463	-3.29246	3.35903	0.066565	-9.79782	10.2605	1.04722
LOC100862171	6.6034	9.38444	4.92145	-2.78104	4.46299	1.68195	-6.87347	22.0543	3.20861
Gm19615	7.44526	10.0146	7.6409	-2.5693	2.37366	-0.195641	-5.93522	5.18255	-1.14523
Gm19279	7.74431	10.2826	9.40325	-2.53831	0.879365	-1.65895	-5.8091	1.83957	-3.15786
Gm15356	5.74033	8.27425	6.85407	-2.53391	1.42018	-1.11374	-5.79141	2.67619	-2.16405
Gm7676	6.88897	9.3642	5.78329	-2.47523	3.58091	1.10568	-5.56054	11.9663	2.15201
Gm17757	11.1528	13.6052	9.49448	-2.45234	4.11069	1.65835	-5.47303	17.2759	3.15655
Gm20235	8.04176	10.2651	7.83941	-2.22338	2.42573	0.202351	-4.66987	5.37302	1.15057
LOC100861917	6.47622	8.61691	5.01795	-2.14068	3.59896	1.45828	-4.40971	12.117	2.7478
Gm24336	10.7217	12.7934	11.3651	-2.07177	1.42837	-0.6434	-4.20402	2.69142	-1.56201
Gm24198	8.31633	10.3564	7.28847	-2.04004	3.0679	1.02786	-4.11257	8.38554	2.039
LOC100862054	7.40199	9.40662	7.78557	-2.00463	1.62105	-0.383581	-4.01287	3.076	-1.30458
Gm20412	7.71744	9.70628	6.40017	-1.98884	3.30611	1.31727	-3.96917	9.89096	2.49194
Gm7281	8.73316	10.6756	9.11509	-1.94245	1.56052	-0.381935	-3.84358	2.9496	-1.30309
Gm23010	5.84944	7.76469	4.01935	-1.91525	3.74533	1.83008	-3.77179	13.4109	3.55558
Ranbp2-ps1	5.64832	7.53335	6.9399	-1.88502	0.593445	-1.29158	-3.69359	1.50885	-2.44796
Gm22079	5.68619	7.54665	6.61705	-1.86045	0.929598	-0.930856	-3.63122	1.90475	-1.90641
Ranbp2-ps7	7.07977	8.87897	8.07131	-1.7992	0.807667	-0.991531	-3.48027	1.75038	-1.98829
LOC100862086	8.91494	10.7004	7.27484	-1.7855	3.4256	1.6401	-3.44738	10.7451	3.11688
Gm15925	9.48008	11.2596	9.08904	-1.77953	2.17057	0.391048	-3.43314	4.50203	1.31135
Gm22006	6.46969	8.23592	6.39995	-1.76623	1.83597	0.069737	-3.40164	3.57011	1.04953
Gm24416	6.46969	8.23592	6.39995	-1.76623	1.83597	0.069737	-3.40164	3.57011	1.04953
LOC100862340	10.6213	12.306	8.06565	-1.68465	4.24031	2.55566	-3.21462	18.8999	5.87936
Gm24308	4.12338	5.79631	4.64382	-1.67293	1.15249	-0.52044	-3.18862	2.22298	-1.43439
Gm26302	16.4533	18.1005	15.6622	-1.64715	2.43834	0.79119	-3.13214	5.42018	1.7305
Gm23237	14.6064	16.2527	13.5883	-1.64633	2.66448	1.01815	-3.13036	6.33999	2.02532
Ranbp2-ps9	7.21756	8.85878	7.84775	-1.64122	1.01103	-0.630189	-3.11929	2.01535	-1.54777
Gm26000	5.07627	6.71291	4.91328	-1.63665	1.79964	0.162992	-3.10942	3.48133	1.11961
Gm22901	11.7833	13.391	11.0335	-1.60765	2.35751	0.74986	-3.04755	5.12485	1.68163
E030024N20Rik	6.28641	7.88494	5.52664	-1.59853	2.35829	0.759764	-3.02835	5.12764	1.69321
Gm22030	12.4329	14.0303	11.9602	-1.59741	2.0701	0.47269	-3.026	4.19916	1.38769
Nlrp1c-ps	8.12299	9.71899	5.40422	-1.596	4.31477	2.71877	-3.02305	19.9011	6.58312
Gm23876	10.3291	11.922	10.4985	-1.59291	1.42355	-0.16936	-3.01657	2.68245	-1.12456
6330407A03Rik	8.10615	9.6927	8.86845	-1.58655	0.824249	-0.762299	-3.0033	1.77061	-1.69619
Gm15373	7.92176	9.50421	7.94682	-1.58244	1.55739	-0.025058	-2.99477	2.9432	-1.01752
Gm11042	14.0481	15.6265	13.3716	-1.57847	2.25493	0.67646	-2.98653	4.77311	1.59821
Gm22104	11.9921	13.5419	11.5265	-1.54975	2.01534	0.46559	-2.92766	4.04276	1.38088
Gm26052	15.0096	16.5462	13.9555	-1.53658	2.59066	1.05408	-2.90106	6.02374	2.07639
Gm14367	5.70118	7.22988	6.28054	-1.52871	0.949342	-0.579364	-2.88527	1.93099	-1.49419
Gm20513	5.19395	6.71916	5.73237	-1.52521	0.98679	-0.538423	-2.87829	1.98177	-1.45238
n-R5s54	5.30326	6.82786	4.27402	-1.5246	2.55384	1.02924	-2.87707	5.87196	2.04095
Gm24683	16.0923	17.5983	15.3406	-1.50593	2.25769	0.75176	-2.84008	4.78225	1.68385
Gm26601	4.63698	6.12778	5.29369	-1.4908	0.834084	-0.656711	-2.81044	1.78272	-1.57648
Gm9025	9.37192	10.8555	8.54047	-1.48361	2.31506	0.83145	-2.79647	4.97624	1.77947
Gm26041	6.36707	7.84557	5.86349	-1.47851	1.98209	0.503581	-2.7866	3.95064	1.41773
Gm23425	15.6393	17.1056	15.0039	-1.46626	2.10162	0.63536	-2.76305	4.29191	1.55333
Gm25508	16.0713	17.5161	16.1513	-1.44479	1.36482	-0.07997	-2.72223	2.57544	-1.057
Gm15283	7.43305	8.87	6.74648	-1.43695	2.12352	0.68657	-2.70747	4.35755	1.60945
Gm26260	15.0592	16.49	14.2405	-1.43085	2.2495	0.81865	-2.69606	4.75518	1.76375
Gm24640	6.58422	8.01492	6.26167	-1.43069	1.75325	0.322553	-2.69576	3.37116	1.25054
Gm22626	6.58422	8.01492	6.26167	-1.43069	1.75325	0.322553	-2.69576	3.37116	1.25054
Gm24366	17.2322	18.6617	16.7741	-1.42949	1.88751	0.45802	-2.69351	3.69996	1.37366
Gm20689	15.2491	16.6758	14.5435	-1.42678	2.13237	0.70559	-2.68846	4.38437	1.63081
Gm22370	12.468	13.8878	11.6966	-1.41982	2.19122	0.7714	-2.67552	4.56692	1.70693
Gm24350	7.45724	8.86463	7.36902	-1.40739	1.49561	0.08822	-2.65257	2.81984	1.06306
Bc1	14.8944	16.2924	14.1555	-1.39808	2.13691	0.73883	-2.63551	4.39819	1.66882
Gm22230	15.7057	17.1022	15.5081	-1.39646	1.59402	0.19756	-2.63255	3.01889	1.14676
Gm15370	7.99702	9.38059	7.28588	-1.38357	2.09471	0.711134	-2.60914	4.27139	1.63709
Gm25062	16.2247	17.6047	15.5686	-1.38001	2.03612	0.65611	-2.6027	4.10141	1.57583
Gm2389	9.7525	11.1298	8.92058	-1.37731	2.20923	0.831912	-2.59784	4.62427	1.78004
Gm26250	7.94649	9.32001	8.12261	-1.37352	1.19739	-0.176125	-2.59102	2.29325	-1.12985
Gm23488	16.7457	18.1148	16.123	-1.3691	1.99176	0.62266	-2.58309	3.97722	1.53971
1700034B16Rik	4.77895	6.14535	4.62684	-1.3664	1.51851	0.152111	-2.57826	2.86494	1.11119
1700084J12Rik	5.59077	6.94822	5.999	-1.35745	0.949225	-0.40823	-2.56233	1.93084	-1.32706
Gm11060	14.9721	16.3289	14.4253	-1.35686	1.90362	0.54676	-2.56127	3.74151	1.4608
Gm22071	14.9331	16.2872	14.2396	-1.35407	2.0476	0.69353	-2.55632	4.13418	1.61724
Gm15448	8.03336	9.3849	7.98115	-1.35154	1.40375	0.052214	-2.55184	2.64588	1.03685
1700071M16Rik	5.80341	7.15104	4.63819	-1.34763	2.51286	1.16523	-2.54494	5.70749	2.24268
Tpd52-ps	10.7055	12.0438	10.0989	-1.33837	1.94498	0.60661	-2.52865	3.85032	1.52268
Gm26624	6.01548	7.33975	6.63507	-1.32427	0.704678	-0.619591	-2.50406	1.62978	-1.53644
VIS1	5.59694	6.91695	5.16137	-1.32001	1.75558	0.435571	-2.49668	3.37662	1.35245
Gm13767	9.73737	11.0544	9.84318	-1.31702	1.21121	-0.105814	-2.49151	2.31531	-1.0761
Gm24482	13.8327	15.1473	12.9544	-1.31453	2.19286	0.87833	-2.48721	4.57211	1.83825
2010310C07Rik	6.41886	7.73088	5.44153	-1.31201	2.28935	0.977332	-2.48288	4.88834	1.96882
Gm14333	5.65257	6.95875	5.94226	-1.30618	1.01649	-0.289696	-2.47287	2.02299	-1.22238
LOC100862040	8.60756	9.91358	9.22447	-1.30602	0.689118	-0.616903	-2.47259	1.6123	-1.53358
Gm26522	6.19992	7.50538	6.24271	-1.30546	1.26267	-0.042791	-2.47162	2.39939	-1.0301
Gm21750	9.53329	10.8345	9.44996	-1.30116	1.38449	0.083333	-2.46427	2.6108	1.05946
LOC100861877	6.59656	7.89754	5.80012	-1.30098	2.09742	0.796442	-2.46396	4.27943	1.73681
Gm25254	4.99569	6.29137	5.0466	-1.29568	1.24477	-0.050914	-2.45493	2.3698	-1.03592
Gm25041	7.65127	8.94049	7.32641	-1.28922	1.61408	0.324864	-2.44395	3.06116	1.25255
Gm15601	4.70722	5.98891	4.37962	-1.28169	1.60929	0.3276	-2.43123	3.05101	1.25492
Gm24132	11.7231	13.0024	10.3186	-1.27932	2.68384	1.40452	-2.42725	6.42564	2.6473
Gm23401	16.5257	17.8022	15.6447	-1.27656	2.15754	0.88098	-2.42261	4.46153	1.84163
Gm23937	16.5938	17.8703	16.0099	-1.2765	1.86042	0.58392	-2.42251	3.63113	1.49892
Gm4929	10.5163	11.7915	10.3189	-1.27524	1.47259	0.19735	-2.42039	2.7752	1.14659
Gm27385	4.83495	6.1101	4.07649	-1.27515	2.03361	0.758459	-2.42024	4.09428	1.69168
Gm26073	4.87194	6.13885	4.53305	-1.26691	1.6058	0.338894	-2.40646	3.04366	1.26479
Gm21798	4.69186	5.95625	3.96737	-1.26438	1.98888	0.724494	-2.40224	3.96928	1.65232
Gm24834	16.7652	18.0223	15.947	-1.25716	2.07533	0.81817	-2.39025	4.21441	1.76317
Gm10134	6.76245	8.01828	6.82581	-1.25584	1.19247	-0.063368	-2.38806	2.28544	-1.0449
Gm23438	14.506	15.757	14.0087	-1.25099	1.74827	0.49728	-2.38005	3.35955	1.41155
Gm10238	7.1994	8.44746	7.23462	-1.24806	1.21284	-0.03522	-2.37522	2.31794	-1.02471
Gm20469	6.43863	7.6845	6.32578	-1.24588	1.35873	0.112847	-2.37163	2.56459	1.08136
Gm18953	10.9272	12.1664	11.2812	-1.23923	0.88525	-0.35398	-2.36073	1.84708	-1.27808
Ighd6-2	2.72646	3.96357	2.83165	-1.23711	1.13192	-0.105194	-2.35726	2.19149	-1.07564
Gm24855	4.20831	5.44429	4.11013	-1.23598	1.33415	0.098172	-2.35541	2.52127	1.07042
Gm12745	5.23972	6.47566	5.33878	-1.23593	1.13687	-0.09906	-2.35534	2.19904	-1.07108
Gm25738	17.4367	18.672	16.9826	-1.23534	1.68937	0.45403	-2.35437	3.22516	1.36986
Gm23468	5.63295	6.85795	5.8961	-1.225	0.961847	-0.263153	-2.33755	1.9478	-1.2001
Gm8865	11.2208	12.4454	8.02738	-1.2247	4.41807	3.19337	-2.33707	21.3782	9.14745
Mirt2	6.10086	7.32168	4.61462	-1.22082	2.70706	1.48624	-2.33079	6.52987	2.80157
Gm25567	12.439	13.6552	10.6745	-1.21614	2.98071	1.76457	-2.32324	7.89375	3.39773
Gm25850	16.1767	17.3895	15.7866	-1.21279	1.60288	0.39009	-2.31785	3.03749	1.31048
Gm12840	13.212	14.4247	13.7187	-1.21271	0.70596	-0.50675	-2.31773	1.63123	-1.42085
Gm22362	9.35074	10.5589	7.88051	-1.20814	2.67837	1.47022	-2.3104	6.4013	2.77065
Gm23617	14.8445	16.0487	14.2703	-1.20419	1.77833	0.57414	-2.30408	3.43029	1.48879
Gm8330	10.1839	11.3841	10.6897	-1.20022	0.69441	-0.50581	-2.29775	1.61822	-1.41992
Gm8750	7.90401	9.10283	7.45897	-1.19882	1.64386	0.445042	-2.29552	3.12501	1.36135
Gm25836	4.50763	5.70547	4.13907	-1.19785	1.56641	0.36856	-2.29397	2.96166	1.29106
Gm20417	13.8537	15.0499	12.7014	-1.19611	2.34845	1.15234	-2.29121	5.09277	2.22274
Gm26020	5.76976	6.96055	5.38582	-1.19079	1.57472	0.383933	-2.28278	2.97878	1.30489
Gm7286	11.7266	12.9108	11.7339	-1.18418	1.17691	-0.00727	-2.27234	2.26092	-1.00505
Gm25307	5.58977	6.76833	5.26242	-1.17856	1.50591	0.32735	-2.26351	2.84004	1.25471
Gm23982	5.65869	6.83406	4.49478	-1.17537	2.33927	1.16391	-2.2585	5.06048	2.24064
Gm22859	9.17438	10.3403	8.56068	-1.16593	1.77963	0.613707	-2.24377	3.43339	1.53019
Zeb2os	6.8422	8.00486	5.15582	-1.16267	2.84904	1.68637	-2.23871	7.20521	3.21847
Gm16028	7.09652	8.25834	6.88644	-1.16181	1.3719	0.210084	-2.23739	2.58811	1.15676
Mup-ps19	5.96597	7.12467	6.44542	-1.1587	0.679249	-0.479447	-2.23256	1.60131	-1.39421
Gm23487	16.4439	17.6011	15.447	-1.15727	2.15411	0.99684	-2.23035	4.45094	1.99562
Gm13371	8.52906	9.68282	8.79745	-1.15376	0.885365	-0.268396	-2.22493	1.84723	-1.20447
Vmn1r-ps83	5.90861	7.06144	6.1144	-1.15283	0.947045	-0.20579	-2.2235	1.92792	-1.15332
Gm22914	13.7194	14.8705	13.6814	-1.15115	1.1891	0.03795	-2.22091	2.2801	1.02665
Gm5507	12.5541	13.7035	12.7398	-1.14939	0.96366	-0.18573	-2.2182	1.95025	-1.13739
Gm24603	15.9036	17.0528	14.9051	-1.14921	2.14779	0.99858	-2.21792	4.43148	1.99803
Gm23945	4.96282	6.10781	4.7796	-1.14499	1.32821	0.183219	-2.21145	2.51091	1.13541
Gm8659	6.51239	7.65517	5.97771	-1.14277	1.67745	0.53468	-2.20805	3.19863	1.44862
Gm24557	16.9209	18.06	16.4689	-1.13905	1.59104	0.45199	-2.20236	3.01266	1.36793
Gm25569	12.6771	13.8157	13.2218	-1.13857	0.59384	-0.54473	-2.20163	1.50926	-1.45875
Gm26258	15.2969	16.4292	14.9378	-1.13231	1.49146	0.35915	-2.19209	2.81173	1.28267
Gm26219	8.00238	9.13429	7.9486	-1.13192	1.18569	0.053777	-2.1915	2.27473	1.03798
Gm19425	10.8738	11.9925	10.8596	-1.11867	1.13291	0.01424	-2.17147	2.19301	1.00992
Gm13768	7.35621	8.47382	7.42814	-1.11762	1.04569	-0.071933	-2.16989	2.06435	-1.05112
Gm9671	7.5526	8.66967	7.16458	-1.11707	1.50508	0.388015	-2.16906	2.83841	1.30859
Gm22196	6.17652	7.28939	5.77503	-1.11288	1.51436	0.401487	-2.16276	2.85673	1.32087
Scgb1b23-ps	5.90109	7.00723	6.16603	-1.10614	0.841203	-0.264939	-2.15269	1.79154	-1.20159
Gm13570	6.30978	7.41524	6.62912	-1.10546	0.786115	-0.31934	-2.15167	1.72442	-1.24776
Snord91a	6.61419	7.71385	7.05576	-1.09967	0.658094	-0.441573	-2.14305	1.578	-1.35808
Gm11653	4.98235	6.08183	4.38827	-1.09947	1.69356	0.594083	-2.14276	3.23453	1.50951
Gm17482	7.09615	8.19361	6.61063	-1.09745	1.58298	0.485526	-2.13977	2.99588	1.4001
Gm22312	6.66593	7.76246	6.38103	-1.09654	1.38143	0.284896	-2.13841	2.60527	1.21832
Gm26586	5.7308	6.8265	5.61487	-1.09571	1.21163	0.115924	-2.13717	2.31599	1.08367
Ms4a4a	14.1685	15.2642	6.99748	-1.0957	8.2667	7.171	-2.13717	307.982	144.108
Gm27299	11.0784	12.1735	9.63515	-1.09518	2.53838	1.4432	-2.1364	5.80935	2.71923
Trav6-1	6.24831	7.33997	6.39429	-1.09166	0.945682	-0.145976	-2.13119	1.9261	-1.10648
Gm27828	7.34385	8.43509	7.33158	-1.09124	1.10351	0.012274	-2.13056	2.14877	1.00854
Gm26051	15.0433	16.1309	12.5773	-1.08764	3.55362	2.46598	-2.12526	11.7421	5.52502
Gm25521	5.06257	6.15002	3.90363	-1.08745	2.24638	1.15894	-2.12497	4.74492	2.23293
Gm14588	5.89474	6.98203	6.13197	-1.08729	0.850062	-0.237224	-2.12474	1.80258	-1.17872
Gm10787	5.69761	6.78164	5.32361	-1.08403	1.45803	0.373997	-2.11995	2.74732	1.29594
Gm23913	16.0706	17.1521	15.6522	-1.08152	1.49997	0.41845	-2.11626	2.82837	1.33649
4931406H21Rik	5.94382	7.02448	6.27944	-1.08065	0.74504	-0.335612	-2.11499	1.67602	-1.26191
Gm22406	16.6218	17.6973	15.6484	-1.07554	2.04891	0.97337	-2.10751	4.13793	1.96342
Mup-ps17	6.0914	7.16598	6.27287	-1.07458	0.893115	-0.18147	-2.10612	1.85718	-1.13404
Gm9522	8.6214	9.68961	9.04684	-1.06821	0.642772	-0.425438	-2.09683	1.56133	-1.34298
Gm22679	7.21146	8.27935	6.50339	-1.06789	1.77596	0.708067	-2.09637	3.42466	1.63361
Gm7665	15.2154	16.2809	14.9549	-1.06549	1.326	0.26051	-2.09288	2.50707	1.1979
Snord45b	18.0159	19.0806	10.8652	-1.06468	8.21544	7.15076	-2.09171	297.231	142.1
Gm15354	6.00819	7.07207	6.33279	-1.06388	0.73928	-0.324602	-2.09055	1.66934	-1.25232
Gm9581	8.41183	9.46886	8.35236	-1.05703	1.1165	0.059472	-2.08065	2.16821	1.04208
Gm22215	7.09954	8.15069	5.07591	-1.05116	3.07478	2.02363	-2.07219	8.42563	4.06605
Gm22072	7.34508	8.3953	6.97215	-1.05022	1.42315	0.372927	-2.07085	2.6817	1.29498
Gm14777	11.183	12.2328	11.4134	-1.04982	0.81938	-0.23044	-2.07027	1.76465	-1.17319
Gm24950	12.211	13.257	12.1927	-1.04605	1.06426	0.01821	-2.06487	2.0911	1.0127
Gm27942	5.58932	6.63419	5.71771	-1.04487	0.916487	-0.128387	-2.06319	1.88751	-1.09307
Platr10	6.09414	7.13664	5.59576	-1.0425	1.54088	0.498379	-2.05979	2.90972	1.41263
Gm25281	6.72273	7.76491	7.11625	-1.04218	0.648668	-0.393514	-2.05934	1.56772	-1.31359
Gm24590	7.40932	8.44702	7.82228	-1.0377	0.624742	-0.412961	-2.05296	1.54194	-1.33142
Gm24093	12.4211	13.4532	10.9083	-1.03209	2.54493	1.51284	-2.04498	5.8358	2.85371
Gm23492	14.0653	15.0929	13.4454	-1.0276	1.64754	0.61994	-2.03863	3.13299	1.53681
Gm7191	6.51023	7.53442	6.32531	-1.02418	1.20911	0.184928	-2.03381	2.31195	1.13676
Gm25361	11.9922	13.0148	10.0357	-1.02265	2.97915	1.9565	-2.03165	7.88521	3.88119
n-R5s216	6.33245	7.35228	5.46748	-1.01983	1.88481	0.864972	-2.02769	3.69304	1.8213
Gm25787	10.9624	11.9822	10.7013	-1.01979	1.28082	0.26103	-2.02762	2.42977	1.19833
Gm22197	9.26724	10.2827	7.65276	-1.01541	2.62989	1.61448	-2.02147	6.18979	3.06202
Gm2840	7.9348	8.94485	5.53329	-1.01004	3.41156	2.40152	-2.01397	10.641	5.28359
Gm5732	6.07629	7.0862	6.10091	-1.00991	0.985282	-0.024624	-2.01378	1.9797	-1.01721
Gm15255	6.41338	7.42296	6.20065	-1.00958	1.22231	0.212733	-2.01332	2.3332	1.15888
Gm8318	9.22856	10.2379	9.05518	-1.0093	1.18267	0.173371	-2.01294	2.26997	1.12769
Gm23586	6.44022	7.44753	5.41394	-1.00731	2.03359	1.02628	-2.01016	4.09424	2.03677
Gm14111	14.2643	15.2708	14.6167	-1.00656	0.65411	-0.35245	-2.00911	1.57364	-1.27673
Gm5270	6.2942	7.29822	6.11379	-1.00402	1.18443	0.180404	-2.00559	2.27273	1.1332
Gm22048	16.5289	17.5328	15.0353	-1.00392	2.49758	1.49366	-2.00544	5.64737	2.81602
Gm25016	5.99526	6.99699	5.96543	-1.00173	1.03156	0.029832	-2.0024	2.04424	1.02089
Gm25997	16.3504	17.3502	15.138	-0.99979	2.21224	1.21245	-1.99971	4.63394	2.31731
Gm17166	6.28282	7.28046	5.65215	-0.997645	1.62831	0.630664	-1.99674	3.0915	1.54828
Gm13175	5.4302	6.42635	4.98668	-0.996146	1.43966	0.443518	-1.99466	2.71258	1.35992
Gm17068	12.6471	13.6404	12.1923	-0.99329	1.44807	0.45478	-1.99072	2.72843	1.37057
Gm8752	7.57526	8.56758	7.41367	-0.992314	1.15391	0.161592	-1.98937	2.22516	1.11852
Gm16167	4.8588	5.84881	4.48325	-0.990013	1.36556	0.375551	-1.9862	2.57677	1.29733
Gm7985	11.4538	12.4416	11.5877	-0.98777	0.8539	-0.13387	-1.98312	1.80738	-1.09723
Gm26077	6.43815	7.42349	5.95879	-0.985338	1.46469	0.479356	-1.97978	2.76005	1.39412
Gm22724	7.90279	8.88695	6.40405	-0.984157	2.4829	1.49874	-1.97816	5.59018	2.82596
Gm7507	12.7098	13.6913	12.7403	-0.98148	0.95101	-0.03047	-1.97449	1.93323	-1.02134
Gm22824	16.6715	17.6522	15.7045	-0.98072	1.94776	0.96704	-1.97345	3.85775	1.95483
Gm27387	8.80985	9.7854	9.1783	-0.975546	0.607092	-0.368454	-1.96639	1.52319	-1.29097
Gm22015	9.95906	10.9307	9.10414	-0.971596	1.82652	0.854922	-1.96101	3.5468	1.80866
Gm23172	4.93203	5.90089	4.10451	-0.968858	1.79638	0.827527	-1.95729	3.47349	1.77464
Gm26893	5.76336	6.73087	5.97323	-0.967512	0.757643	-0.209869	-1.95547	1.69073	-1.15658
Gm26426	6.29452	7.2614	6.34093	-0.966874	0.920466	-0.046408	-1.9546	1.89273	-1.03269
Gm26060	6.29452	7.2614	6.34093	-0.966874	0.920466	-0.046408	-1.9546	1.89273	-1.03269
Gm14275	6.2045	7.16925	6.32615	-0.964745	0.843102	-0.121643	-1.95172	1.7939	-1.08797
Gm23291	12.6291	13.5929	12.512	-0.96375	1.08081	0.11706	-1.95037	2.11522	1.08452
Gm13810	8.91907	9.88276	8.86449	-0.963695	1.01827	0.054578	-1.9503	2.02549	1.03856
Gm23963	13.5374	14.5001	13.2475	-0.96267	1.25258	0.28991	-1.94891	2.38267	1.22256
Gm11352	6.27801	7.24036	6.18283	-0.96235	1.05753	0.095175	-1.94848	2.08136	1.06819
Gm26658	5.7423	6.70393	4.99154	-0.961636	1.71239	0.750759	-1.94752	3.27704	1.68268
Gm24282	7.1248	8.08553	7.20486	-0.960729	0.880664	-0.080065	-1.94629	1.84122	-1.05707
Gm21961	13.0388	13.9992	12.1803	-0.96039	1.81891	0.85852	-1.94584	3.52815	1.81318
Gm23961	14.6901	15.6504	13.0589	-0.9603	2.59144	1.63114	-1.94571	6.027	3.09758
Gm23578	10.324	11.2825	9.6731	-0.95852	1.60938	0.65086	-1.94332	3.05121	1.5701
Gm5187	6.15116	7.10168	6.37495	-0.950516	0.726726	-0.22379	-1.93256	1.65488	-1.1678
Gm11479	5.5533	6.50322	5.32185	-0.949923	1.18137	0.231443	-1.93177	2.26791	1.17401
Gm24550	4.80749	5.75713	4.5353	-0.949641	1.22183	0.272188	-1.93139	2.33242	1.20764
Gm12417	4.31882	5.2679	4.63668	-0.949083	0.631219	-0.317864	-1.93065	1.54887	-1.24648
Gm9034	9.78484	10.7338	9.98025	-0.94897	0.753565	-0.195405	-1.93049	1.68595	-1.14505
Gm12117	7.59695	8.54453	7.83535	-0.947581	0.709183	-0.238398	-1.92864	1.63488	-1.17968
Gm7129	11.2711	12.2187	11.6152	-0.94758	0.60353	-0.34405	-1.92863	1.51943	-1.26931
Gm15930	8.03557	8.98305	7.63388	-0.94748	1.34917	0.401686	-1.9285	2.54765	1.32105
Gm23078	5.20072	6.14439	4.58299	-0.943667	1.5614	0.617736	-1.92341	2.95141	1.53447
Gm16380	9.12242	10.0656	9.47825	-0.943202	0.587372	-0.35583	-1.92279	1.50251	-1.27972
Gm12267	6.43352	7.37546	6.63974	-0.941943	0.735719	-0.206224	-1.92111	1.66523	-1.15366
Gm16014	7.17789	8.11811	7.23988	-0.94022	0.878236	-0.061984	-1.91882	1.83813	-1.0439
Gm25753	6.33973	7.277	6.5464	-0.937269	0.730597	-0.206672	-1.9149	1.65933	-1.15402
Gm11557	11.3971	12.3343	11.4522	-0.93724	0.88213	-0.05511	-1.91486	1.84309	-1.03894
Speer8-ps1	8.27969	9.2165	6.59537	-0.936807	2.62113	1.68432	-1.91429	6.15231	3.21389
Gm24777	4.95683	5.89272	4.61818	-0.935892	1.27454	0.338646	-1.91307	2.41921	1.26457
Gm22358	11.7825	12.7147	12.005	-0.9322	0.70972	-0.22248	-1.90818	1.63549	-1.16674
Gm22672	8.37528	9.30408	7.89462	-0.9288	1.40946	0.480657	-1.90369	2.65637	1.39538
Gm23872	16.0864	17.0143	16.1142	-0.9279	0.90017	-0.02773	-1.9025	1.86629	-1.01941
Gm2383	10.1873	11.1129	10.2772	-0.92564	0.83572	-0.08992	-1.89953	1.78475	-1.06431
Gm23990	11.3997	12.3208	11.4274	-0.92108	0.89343	-0.02765	-1.89353	1.85759	-1.01935
Gm22441	16.4999	17.4201	15.3371	-0.92022	2.08303	1.16281	-1.8924	4.23696	2.23893
D13Mgi7	5.80213	6.72003	5.86253	-0.917904	0.857506	-0.060398	-1.88937	1.8119	-1.04275
Gm22715	14.4828	15.3993	12.0449	-0.91641	3.35433	2.43792	-1.88741	10.2271	5.4186
Gm26420	5.05696	5.97252	3.93051	-0.915562	2.04201	1.12645	-1.8863	4.11818	2.1832
Gm12949	7.0731	7.98749	7.16375	-0.914386	0.823733	-0.090653	-1.88477	1.76998	-1.06485
1700101I11Rik	4.99436	5.90404	3.9981	-0.909675	1.90593	0.996257	-1.87862	3.74751	1.99482
Gm17165	5.9919	6.89881	6.00401	-0.906903	0.894796	-0.012107	-1.87502	1.85935	-1.00843
Gm10571	6.22894	7.13584	6.12571	-0.906891	1.01013	0.103237	-1.875	2.01409	1.07418
Gm7909	11.9833	12.8859	9.84372	-0.90264	3.04222	2.13958	-1.86948	8.23758	4.40634
Gm23535	5.96375	6.86091	5.68885	-0.897162	1.17206	0.274893	-1.8624	2.25332	1.2099
Gm25285	7.05649	7.94957	6.35254	-0.893084	1.59703	0.703943	-1.85714	3.02519	1.62895
Vmn1r-ps55	5.07016	5.9631	4.266	-0.89294	1.6971	0.804161	-1.85696	3.24249	1.74613
AC166333.1	8.27683	9.1679	7.12899	-0.891069	2.0389	1.14783	-1.85455	4.10933	2.21581
Gm9568	6.58211	7.4719	6.55405	-0.889787	0.917849	0.028062	-1.8529	1.8893	1.01964
Gm23181	6.80867	7.69236	6.61182	-0.883692	1.08055	0.196857	-1.84509	2.11484	1.1462
Gm2427	11.4008	12.2826	10.3939	-0.88171	1.88863	1.00692	-1.84256	3.70283	2.00962
Gapdh-ps14	12.8354	13.7162	12.9479	-0.8808	0.76822	-0.11258	-1.8414	1.70317	-1.08116
Mup-ps5	6.03481	6.91495	6.15773	-0.880149	0.757221	-0.122928	-1.84057	1.69023	-1.08894
Gm17131	15.0327	15.9124	15.2636	-0.87972	0.64888	-0.23084	-1.84002	1.56795	-1.17352
Gm25040	13.7519	14.6302	12.9743	-0.87831	1.65589	0.77758	-1.83822	3.15118	1.71425
Gm24342	10.9143	11.7899	9.04419	-0.87556	2.74567	1.87012	-1.83472	6.70703	3.65562
Gm11464	7.79093	8.66555	7.20934	-0.874623	1.45621	0.581591	-1.83353	2.74387	1.4965
Plxna4os3	6.06406	6.93573	6.20778	-0.871673	0.727958	-0.143715	-1.82978	1.65629	-1.10475
Gm20343	7.02966	7.90111	6.86263	-0.871456	1.03849	0.167032	-1.82951	2.05407	1.12275
Gm26233	14.6121	15.4808	12.2487	-0.86876	3.23211	2.36335	-1.82609	9.39641	5.14564
Gm7735	8.98168	9.84583	8.57885	-0.864151	1.26698	0.402829	-1.82027	2.40657	1.3221
Gm14533	5.59718	6.45876	5.36182	-0.861577	1.09694	0.23536	-1.81702	2.139	1.1772
Gm26472	15.2599	16.1211	14.2594	-0.86124	1.8617	1.00046	-1.8166	3.63436	2.00064
Gm23679	6.15898	7.01783	5.66458	-0.858845	1.35325	0.494401	-1.81359	2.55486	1.40874
Gm23391	7.78468	8.64187	7.04019	-0.857189	1.60169	0.744499	-1.81151	3.03498	1.67539
Vmn1r-ps152	5.59501	6.45212	5.10532	-0.857113	1.34679	0.489681	-1.81141	2.54346	1.40413
Gm23274	7.46267	8.31836	7.03647	-0.855687	1.28189	0.426203	-1.80962	2.43157	1.34369
Gm26092	7.14581	7.99569	6.1361	-0.849876	1.85959	1.00971	-1.80235	3.62904	2.01351
Gm22403	10.1527	11.0023	8.59132	-0.84961	2.41101	1.5614	-1.80201	5.31846	2.9514
Gm26552	5.94402	6.79173	5.94883	-0.847712	0.842903	-0.004809	-1.79964	1.79366	-1.00334
Gm24732	4.46011	5.30584	3.36583	-0.845728	1.94001	1.09428	-1.79717	3.83708	2.13507
Gm14883	5.61694	6.46126	5.08238	-0.844318	1.37887	0.534557	-1.79542	2.60065	1.4485
Gm17138	7.47546	8.3177	7.55547	-0.842242	0.762229	-0.080013	-1.79283	1.69611	-1.05703
9030204H09Rik	4.96626	5.80498	4.10309	-0.838721	1.70189	0.863167	-1.78846	3.25326	1.81903
Gm16353	5.4846	6.31805	5.62962	-0.833447	0.688426	-0.145021	-1.78194	1.61152	-1.10575
Gm24787	4.45006	5.28031	4.34751	-0.830248	0.932793	0.102545	-1.77799	1.90897	1.07367
Gm10447	4.81576	5.64171	4.41244	-0.825949	1.22927	0.403322	-1.7727	2.34448	1.32255
Gm23190	17.975	18.8009	15.8575	-0.82583	2.94333	2.1175	-1.77255	7.69185	4.33941
Gm13248	11.6346	12.4594	10.6548	-0.82478	1.80459	0.97981	-1.77126	3.4933	1.97221
Gm23709	9.26279	10.0841	8.8122	-0.821356	1.27195	0.450597	-1.76707	2.41488	1.36661
Gm25758	5.97472	6.79453	5.52445	-0.819813	1.27008	0.450268	-1.76518	2.41175	1.36629
Gm12237	4.51231	5.33153	3.89665	-0.819215	1.43488	0.615661	-1.76445	2.70359	1.53226
Gm25629	5.98149	6.79542	4.81233	-0.813937	1.98309	1.16915	-1.758	3.95339	2.2488
Gm27361	11.5676	12.3798	10.9231	-0.81216	1.45664	0.64448	-1.75584	2.74468	1.56318
Gm24911	5.4107	6.22256	4.60859	-0.811855	1.61397	0.802116	-1.75547	3.06093	1.74366
Gm26321	4.26722	5.07751	4.30562	-0.810283	0.77189	-0.038393	-1.75356	1.70751	-1.02697
Gm8957	5.96712	6.77731	5.85376	-0.81019	0.923553	0.113363	-1.75344	1.89678	1.08175
2010111I01Rik	6.15494	6.9631	5.12112	-0.808165	1.84198	1.03382	-1.75098	3.58502	2.04743
Gm23527	6.04817	6.85454	5.72051	-0.806365	1.13403	0.327661	-1.7488	2.1947	1.25498
Gm6113	6.3179	7.12308	6.37842	-0.805172	0.744659	-0.060513	-1.74735	1.67558	-1.04284
Gm23713	9.364	10.1679	8.18971	-0.803889	1.97818	1.17429	-1.7458	3.93995	2.25681
Gm22615	9.364	10.1679	8.18971	-0.803889	1.97818	1.17429	-1.7458	3.93995	2.25681
Gm22194	8.50005	9.29714	8.55617	-0.797081	0.740966	-0.056115	-1.73758	1.67129	-1.03966
Gm14257	5.60315	6.40017	5.4512	-0.797023	0.948973	0.15195	-1.73751	1.9305	1.11107
Gm6176	6.54855	7.34453	6.14995	-0.795983	1.19458	0.3986	-1.73626	2.28879	1.31823
Gm25343	7.17922	7.9745	5.35547	-0.795284	2.61903	1.82375	-1.73542	6.14337	3.53999
Scarna13	10.5386	11.3333	9.88137	-0.79473	1.45195	0.657225	-1.73475	2.73579	1.57705
Gm6498	5.93071	6.72474	5.80911	-0.794034	0.915635	0.121601	-1.73392	1.8864	1.08794
Gm25374	8.75246	9.54447	7.57242	-0.792011	1.97205	1.18004	-1.73149	3.92326	2.26583
Gm24211	6.20976	7.00037	4.99063	-0.790601	2.00974	1.21914	-1.72979	4.02709	2.32807
Gm22938	6.28602	7.07641	5.52932	-0.79039	1.54709	0.756699	-1.72954	2.92227	1.68962
Gm22970	5.35665	6.14658	4.24418	-0.789934	1.9024	1.11246	-1.729	3.73834	2.16214
Gm3106	6.44123	7.22883	6.60398	-0.787607	0.624848	-0.162759	-1.72621	1.54205	-1.11943
Gm23389	7.911	8.69554	7.13118	-0.784537	1.56436	0.779819	-1.72254	2.95745	1.71692
Gm17155	6.37921	7.16272	6.43506	-0.783505	0.727658	-0.055847	-1.72131	1.65595	-1.03947
Gm24717	4.6664	5.44947	4.47364	-0.783072	0.975827	0.192755	-1.72079	1.96677	1.14294
Gm3839	11.3253	12.1077	11.5117	-0.78248	0.59602	-0.18646	-1.72009	1.51154	-1.13797
Gm23881	12.5473	13.3273	12.0193	-0.78007	1.30803	0.52796	-1.71721	2.47603	1.44189
Gm23159	12.433	13.2109	12.149	-0.77787	1.06186	0.28399	-1.7146	2.08762	1.21756
LOC100862216	6.30673	7.08455	5.92104	-0.777828	1.16351	0.385686	-1.71455	2.24002	1.30648
Gm8824	11.8717	12.6495	11.9741	-0.77779	0.67547	-0.10232	-1.7145	1.59712	-1.0735
Gm6944	8.06202	8.8389	7.99421	-0.776882	0.844698	0.067816	-1.71342	1.79589	1.04813
Gm24606	11.9523	12.7287	10.8116	-0.77638	1.91707	1.14069	-1.71283	3.77655	2.20486
Gm24108	14.4526	15.2278	14.3737	-0.77525	0.85415	0.0789	-1.71149	1.80769	1.05621
Gm22936	8.41954	9.1946	7.25908	-0.775068	1.93552	1.16045	-1.71127	3.82516	2.23528
Gm11951	11.8052	12.5799	7.79401	-0.77474	4.78592	4.01118	-1.71088	27.587	16.1244
Scarna9	10.7648	11.5376	10.8714	-0.77283	0.6662	-0.10663	-1.70862	1.58689	-1.07671
Gm13238	7.97369	8.74585	7.82402	-0.772158	0.921827	0.149669	-1.70782	1.89451	1.10931
Gm22734	13.4068	14.1767	11.5331	-0.76984	2.64359	1.87375	-1.70508	6.24885	3.66484
Gm23595	7.6181	8.38609	7.40982	-0.767991	0.976261	0.20827	-1.7029	1.96736	1.1553
Gm17199	6.54647	7.31357	6.53196	-0.7671	0.781611	0.014511	-1.70185	1.71905	1.01011
Gm7572	8.16178	8.92756	7.38818	-0.765782	1.53938	0.773596	-1.70029	2.90669	1.70953
Gm22299	7.2288	7.99329	6.77692	-0.764488	1.21637	0.451879	-1.69877	2.32361	1.36782
Gm2546	17.4524	18.2165	17.6113	-0.76407	0.60522	-0.15885	-1.69827	1.52121	-1.1164
Gm20382	5.22026	5.98222	4.91794	-0.761966	1.06429	0.302321	-1.6958	2.09114	1.23313
Gm23842	16.6266	17.3859	15.8236	-0.7593	1.56226	0.80296	-1.69267	2.95316	1.74468
Gm5863	12.5264	13.282	12.6704	-0.75559	0.61157	-0.14402	-1.68832	1.52792	-1.10498
Gm19984	7.21183	7.96609	6.70674	-0.754262	1.25936	0.505095	-1.68677	2.39389	1.41922
Gm20391	8.49243	9.24621	7.70777	-0.753781	1.53844	0.784663	-1.68621	2.90481	1.72269
Gm24709	7.02029	7.77367	6.70924	-0.753373	1.06443	0.311058	-1.68573	2.09134	1.24062
mt-Tr	16.0981	16.8493	15.1743	-0.7512	1.67502	0.92382	-1.68319	3.19324	1.89713
LOC100861641	7.18201	7.93316	6.67382	-0.75115	1.25934	0.508185	-1.68313	2.39385	1.42226
Gm25570	7.9369	8.68797	7.48409	-0.751068	1.20388	0.452811	-1.68304	2.30358	1.3687
Gm22806	11.279	12.026	9.03243	-0.74691	2.99353	2.24662	-1.67819	7.96419	4.74569
Gm12182	12.7877	13.534	12.3949	-0.74629	1.13905	0.39276	-1.67747	2.20236	1.3129
Vmn1r-ps75	7.53078	8.2746	7.13272	-0.743827	1.14188	0.398055	-1.67461	2.20669	1.31773
Gm5944	11.5556	12.2993	11.4694	-0.74375	0.82989	0.08614	-1.67452	1.77755	1.06153
Gm7792	5.83702	6.58073	5.95446	-0.743714	0.626268	-0.117446	-1.67448	1.54357	-1.08481
Gm10999	8.09639	8.83984	7.44586	-0.743445	1.39398	0.650535	-1.67417	2.62803	1.56975
Gm12445	7.13276	7.87552	7.07716	-0.742768	0.79836	0.055592	-1.67338	1.73912	1.03929
Gm2076	9.03707	9.77927	9.11896	-0.742204	0.660314	-0.08189	-1.67273	1.58043	-1.0584
Gm26573	8.1518	8.89304	7.58266	-0.741241	1.31038	0.569143	-1.67161	2.48008	1.48364
Vmn2r-ps18	6.60295	7.34411	5.59922	-0.741158	1.74489	1.00373	-1.67152	3.35169	2.00518
Gm24004	6.37051	7.10886	6.34039	-0.73835	0.768463	0.030113	-1.66827	1.70345	1.02109
Gm22933	15.9652	16.7027	14.9476	-0.73751	1.75514	1.01763	-1.6673	3.37559	2.02459
Gm22117	15.4153	16.1513	13.0033	-0.73601	3.14796	2.41195	-1.66556	8.86401	5.32193
Gm11318	4.69372	5.42819	3.8356	-0.734474	1.59259	0.858117	-1.66379	3.01591	1.81267
Gm26216	6.61959	7.35293	5.9549	-0.733343	1.39803	0.664688	-1.66249	2.63542	1.58523
Gm25724	6.94209	7.67514	6.5096	-0.733055	1.16554	0.432487	-1.66216	2.24317	1.34956
Gm2066	5.91986	6.65244	5.32714	-0.732581	1.32531	0.592724	-1.66161	2.50586	1.50809
Gm4335	11.5675	12.2994	11.4338	-0.73189	0.86552	0.13363	-1.66081	1.822	1.09705
Gm11321	4.66919	5.39299	3.87769	-0.723803	1.5153	0.791499	-1.65153	2.85859	1.73087
Gm12464	7.07762	7.80055	6.49771	-0.72293	1.30283	0.579903	-1.65053	2.46713	1.49475
Gm15191	12.9997	13.7166	12.74	-0.71686	0.97659	0.25973	-1.6436	1.96781	1.19725
Gm22232	14.9047	15.6212	13.8493	-0.71659	1.77194	1.05535	-1.64329	3.41513	2.07822
Gm26913	7.13907	7.85559	7.2202	-0.716526	0.635393	-0.081133	-1.64322	1.55336	-1.05785
Gm10205	6.42629	7.14258	6.45645	-0.716285	0.686135	-0.03015	-1.64295	1.60897	-1.02112
Gm25069	12.1319	12.8469	11.3853	-0.71495	1.46155	0.7466	-1.64143	2.75404	1.67783
Gm23653	6.33301	7.04615	5.02029	-0.713131	2.02586	1.31273	-1.63936	4.07234	2.48411
Gm23270	8.29396	9.00688	8.15877	-0.712924	0.848114	0.13519	-1.63912	1.80015	1.09824
Gm23654	5.58102	6.29301	5.08907	-0.711989	1.20394	0.491953	-1.63806	2.30368	1.40635
Gm25771	6.99027	7.70066	6.93877	-0.710382	0.761888	0.051506	-1.63624	1.69571	1.03635
Gm7651	5.6406	6.35074	5.74175	-0.710141	0.608992	-0.101149	-1.63596	1.52519	-1.07263
Gm16459	6.16718	6.87661	6.1211	-0.709432	0.755513	0.046081	-1.63516	1.68823	1.03246
Gm6441	8.70371	9.41269	8.14078	-0.708977	1.27191	0.562933	-1.63464	2.41481	1.47727
Gm26897	8.61767	9.32552	7.89461	-0.707849	1.43091	0.723061	-1.63337	2.69617	1.65068
Gm20678	6.75697	7.46331	6.46134	-0.706344	1.00197	0.295629	-1.63166	2.00274	1.22742
Gm22957	6.71694	7.42069	6.34426	-0.703751	1.07643	0.372674	-1.62873	2.1088	1.29475
Gm16429	5.8692	6.57219	5.42103	-0.702985	1.15116	0.448171	-1.62787	2.22092	1.36431
Gm7971	5.8692	6.57219	5.42103	-0.702985	1.15116	0.448171	-1.62787	2.22092	1.36431
Gm15369	6.87236	7.57423	5.56006	-0.701867	2.01416	1.31229	-1.62661	4.03946	2.48336
Gm5430	13.8327	14.5299	13.8898	-0.69725	0.64017	-0.05708	-1.62141	1.55851	-1.04036
D5Ertd605e	6.9561	7.65189	6.43664	-0.695792	1.21525	0.519462	-1.61977	2.32182	1.43342
Gm23431	5.26185	5.95525	4.80567	-0.693397	1.14957	0.456176	-1.61709	2.21848	1.3719
Obox4-ps31	6.2142	6.90752	6.2817	-0.69332	0.625819	-0.067501	-1.617	1.54309	-1.0479
Gm26755	5.0809	5.77403	4.19096	-0.693134	1.58308	0.889941	-1.61679	2.99608	1.8531
Mup-ps25	7.33188	8.02032	6.78813	-0.68844	1.23219	0.543749	-1.61154	2.34923	1.45776
Gm25568	16.022	16.709	14.7944	-0.68705	1.91461	1.22756	-1.60999	3.77012	2.34171
Gm22960	8.95103	9.63332	8.4138	-0.682287	1.21952	0.537233	-1.60468	2.32869	1.45119
Gm16285	4.74174	5.42178	4.32613	-0.680042	1.09565	0.415609	-1.60219	2.13709	1.33386
Gm27164	6.6759	7.35559	6.6606	-0.679687	0.694991	0.015304	-1.60179	1.61887	1.01066
Gm25936	6.30116	6.97682	5.21048	-0.675664	1.76634	1.09067	-1.59733	3.40189	2.12973
Gm23677	7.45108	8.12567	6.18751	-0.674584	1.93815	1.26357	-1.59614	3.83215	2.40089
Gm25246	10.7105	11.3846	10.7152	-0.6741	0.66933	-0.00477	-1.5956	1.59033	-1.00331
Gm25232	6.00382	6.6767	5.82795	-0.672881	0.848749	0.175868	-1.59425	1.80094	1.12964
Gm22763	7.88352	8.55406	6.81872	-0.670544	1.73534	1.0648	-1.59167	3.32959	2.09188
Gm15917	4.18452	4.8506	4.2146	-0.666075	0.635997	-0.030078	-1.58675	1.55401	-1.02107
Gm26050	11.9827	12.6427	10.2634	-0.66006	2.37933	1.71927	-1.58015	5.20295	3.2927
Gm25517	9.96951	10.6283	8.94764	-0.658829	1.6807	1.02187	-1.5788	3.20584	2.03055
Gm26912	5.10461	5.76296	4.7619	-0.658352	1.00106	0.342707	-1.57828	2.00147	1.26813
Gm24884	5.0371	5.69538	4.44031	-0.658272	1.25507	0.596796	-1.57819	2.38678	1.51235
Gm6264	8.7079	9.3641	8.73488	-0.656196	0.629218	-0.026978	-1.57592	1.54673	-1.01888
Gm11198	7.27135	7.92575	6.92752	-0.654393	0.998227	0.343834	-1.57395	1.99754	1.26912
Gm11751	5.3486	6.00005	4.97229	-0.651454	1.02776	0.376309	-1.57075	2.03886	1.29802
Gm23423	5.70132	6.35108	4.67835	-0.649767	1.67273	1.02296	-1.56891	3.18817	2.03209
Gm22523	7.35542	8.00355	5.87618	-0.64813	2.12737	1.47924	-1.56714	4.36921	2.78802
Gm23873	6.4565	7.10301	5.5177	-0.646512	1.5853	0.938791	-1.56538	3.00071	1.91692
Gm15690	5.64482	6.29021	4.88299	-0.645392	1.40722	0.761827	-1.56416	2.65225	1.69564
9130230L23Rik	5.92059	6.56094	5.23048	-0.640346	1.33046	0.690112	-1.5587	2.51482	1.61341
LOC100048471	4.79048	5.43075	4.15812	-0.640266	1.27263	0.632361	-1.55862	2.41601	1.5501
Gm12649	5.46363	6.10237	4.88307	-0.638747	1.2193	0.580557	-1.55698	2.32834	1.49543
Gm13989	8.76326	9.40095	8.33602	-0.637685	1.06493	0.427246	-1.55583	2.09207	1.34466
Gm27703	10.8829	11.5205	10.5971	-0.63762	0.92346	0.28584	-1.55576	1.89666	1.21912
Gm27039	6.19432	6.8298	5.86432	-0.63548	0.965475	0.329995	-1.55345	1.95271	1.25701
Gm22089	6.73198	7.36409	6.09246	-0.632107	1.27162	0.639515	-1.54983	2.41433	1.55781
Gm27393	5.69209	6.32177	5.13388	-0.62968	1.18789	0.558207	-1.54722	2.27819	1.47244
AA066038	6.09683	6.72594	4.81484	-0.629117	1.91111	1.28199	-1.54662	3.76097	2.43174
Gm24147	5.44623	6.07376	5.33345	-0.627529	0.740302	0.112773	-1.54492	1.67053	1.0813
Gm11116	5.85434	6.47697	5.31562	-0.622623	1.16135	0.538724	-1.53967	2.23666	1.45269
Zscan4f	5.30528	5.92721	4.98163	-0.62193	0.945587	0.323657	-1.53893	1.92597	1.2515
Gm5652	10.3641	10.9857	10.1373	-0.62154	0.84842	0.22688	-1.53852	1.80053	1.1703
Gm25003	16.4974	17.1187	15.5287	-0.62137	1.59002	0.96865	-1.53834	3.01054	1.95701
Gm22374	6.64356	7.26224	5.67813	-0.618675	1.5841	0.965428	-1.53546	2.99821	1.95264
Gm22602	6.48861	7.1061	5.45644	-0.617489	1.64965	1.03216	-1.5342	3.13758	2.04509
Gm8709	7.68835	8.30566	7.30749	-0.617318	0.998171	0.380853	-1.53402	1.99747	1.30211
Gm24161	5.33065	5.94536	4.96685	-0.614702	0.978505	0.363803	-1.53124	1.97042	1.28681
Gm23276	6.55539	7.16512	5.56299	-0.609734	1.60213	0.992399	-1.52598	3.03592	1.98949
Gm26609	5.69155	6.29913	5.25032	-0.607583	1.04881	0.441228	-1.5237	2.06882	1.35776
Gm22019	6.37161	6.97827	5.02141	-0.60666	1.95685	1.35019	-1.52273	3.88214	2.54946
1700003C15Rik	5.67311	6.27852	5.42901	-0.605406	0.849508	0.244102	-1.52141	1.80189	1.18436
Gm25608	9.85655	10.4607	9.11583	-0.604112	1.34483	0.740716	-1.52004	2.54	1.671
Gm17644	5.14463	5.74805	4.57747	-0.603425	1.17059	0.567164	-1.51932	2.25104	1.48161
Serpina3e-ps	5.7765	6.37868	5.75797	-0.602178	0.620708	0.01853	-1.51801	1.53763	1.01293
Speer4c	7.89207	8.49379	6.87257	-0.601717	1.62122	1.0195	-1.51752	3.07635	2.02722
Gm5185	6.31633	6.91792	6.16409	-0.601594	0.753831	0.152237	-1.51739	1.68626	1.11129
Gm9081	10.7296	11.3311	10.3859	-0.60151	0.94522	0.34371	-1.5173	1.92548	1.26902
9130227L01Rik	5.56631	6.16696	4.91713	-0.600644	1.24983	0.649183	-1.51639	2.37813	1.56828
Gm11453	9.1365	9.73657	9.06031	-0.600069	0.676258	0.076189	-1.51579	1.59799	1.05423
LOC215866	9.25971	9.85906	9.15026	-0.599352	0.708797	0.109445	-1.51504	1.63444	1.07881
Snord92	9.68897	10.2882	8.66105	-0.599216	1.62714	1.02792	-1.51489	3.089	2.03909
Gm22804	6.3531	6.95181	5.92567	-0.598715	1.02614	0.427427	-1.51437	2.03657	1.34483
LOC100862313	7.08217	7.6771	5.93366	-0.594932	1.74343	1.1485	-1.5104	3.34831	2.21684
Hmga2-ps1	7.24634	7.84049	7.03833	-0.594158	0.802163	0.208005	-1.50959	1.74371	1.15509
Neat1	10.9386	11.5304	10.466	-0.59173	1.06437	0.47264	-1.50705	2.09126	1.38765
Gm21370	7.73403	8.32551	4.56946	-0.591477	3.75605	3.16458	-1.50679	13.5109	8.96669
Gm13882	13.7673	14.3567	13.4811	-0.58936	0.87558	0.28622	-1.50458	1.83475	1.21944
Gm24122	5.87915	6.46837	5.29244	-0.589215	1.17593	0.586713	-1.50443	2.25938	1.50182
Gm13326	8.16674	8.7548	7.67983	-0.588063	1.07498	0.486913	-1.50323	2.10669	1.40144
Gm23131	5.2016	5.78789	4.60817	-0.586287	1.17971	0.593425	-1.50138	2.26532	1.50882
Gm14658	11.0593	11.645	10.6472	-0.58576	0.99782	0.41206	-1.50083	1.99698	1.33058
Gm10945	11.4217	12.0072	7.51018	-0.58547	4.497	3.91152	-1.50053	22.5803	15.0483
Gm11510	7.00975	6.42371	9.0055	0.586046	-2.5818	-1.99575	1.50113	-5.98685	-3.98823
Ighv1-63	7.94187	7.35335	8.39948	0.588516	-1.04613	-0.457612	1.5037	-2.06498	-1.37327
Gm9013	12.283	11.694	13.5493	0.58903	-1.85534	-1.26631	1.50424	-3.61837	-2.40546
Gm14323	10.3107	9.71797	14.6687	0.592727	-4.95073	-4.358	1.50809	-30.9255	-20.5064
Gm12643	10.1875	9.59355	12.3871	0.593968	-2.7935	-2.19953	1.50939	-6.93309	-4.5933
Gm27022	5.66219	5.06664	6.40878	0.595548	-1.34214	-0.746594	1.51105	-2.53527	-1.67783
Gm5745	8.98663	8.39092	11.9665	0.595705	-3.5756	-2.97989	1.51121	-11.9223	-7.88927
Rps10-ps1	11.1645	10.5685	13.7698	0.596	-3.20121	-2.60521	1.51152	-9.1973	-6.0848
Gm4737	7.33295	6.73457	7.7179	0.598384	-0.983327	-0.384943	1.51402	-1.97702	-1.30581
Gm5121	10.3879	9.78848	14.641	0.599433	-4.85253	-4.2531	1.51512	-28.8907	-19.0682
Gm15607	9.40791	8.80611	11.2951	0.601794	-2.48896	-1.88716	1.5176	-5.61372	-3.69907
Gm13137	8.21156	7.60957	10.2997	0.601988	-2.69009	-2.0881	1.51781	-6.45355	-4.25189
Gm12950	6.97316	6.36736	7.43459	0.605797	-1.06723	-0.461429	1.52182	-2.0954	-1.3769
Rps15a-ps7	13.8732	13.2652	17.4843	0.60804	-4.21911	-3.61107	1.52419	-18.6242	-12.2191
Gm27003	6.26289	5.65304	7.03464	0.60985	-1.3816	-0.771747	1.5261	-2.60557	-1.70734
Rpl23a-ps14	9.10976	8.49595	11.2464	0.613812	-2.75048	-2.13667	1.5303	-6.7294	-4.39744
Gm12749	7.12109	6.50713	7.20706	0.613964	-0.699932	-0.085968	1.53046	-1.62443	-1.0614
Gm11263	13.2012	12.5863	16.21	0.61492	-3.62367	-3.00875	1.53147	-12.3263	-8.04867
Gm5384	9.46734	8.85223	10.745	0.615105	-1.89277	-1.27766	1.53167	-3.71347	-2.42446
Gm14414	11.7666	11.1487	16.4271	0.61792	-5.27839	-4.66047	1.53466	-38.8109	-25.2896
Gm5978	10.0098	9.39006	10.3634	0.619762	-0.973342	-0.35358	1.53662	-1.96338	-1.27773
Gm11307	6.79482	6.17443	7.7632	0.620389	-1.58876	-0.968374	1.53729	-3.00791	-1.95663
Gm9040	9.46302	8.84218	9.58046	0.620835	-0.738273	-0.117438	1.53776	-1.66818	-1.08481
Gm9044	9.46302	8.84218	9.58046	0.620835	-0.738273	-0.117438	1.53776	-1.66818	-1.08481
Gm13015	9.32919	8.70671	10.2415	0.622478	-1.53482	-0.912343	1.53952	-2.89752	-1.8821
Gm13194	11.6041	10.981	12.2114	0.6231	-1.2304	-0.6073	1.54018	-2.34632	-1.52341
Rps8-ps2	11.7267	11.1014	16.5187	0.62532	-5.41735	-4.79203	1.54255	-42.7351	-27.7041
LOC102638521	6.3269	5.70064	6.60348	0.626256	-0.902843	-0.276587	1.54355	-1.86975	-1.21133
Gm12818	4.74768	4.1207	5.29828	0.62698	-1.17758	-0.550596	1.54433	-2.26196	-1.46469
Gm19400	7.46769	6.83993	9.36555	0.627754	-2.52562	-1.89787	1.54516	-5.75821	-3.72662
Gm7241	7.84451	7.2164	7.8903	0.628107	-0.673899	-0.045792	1.54554	-1.59538	-1.03225
Dnaja1-ps	7.52095	6.88847	8.2078	0.632476	-1.31933	-0.686853	1.55022	-2.4955	-1.60977
Rpl28-ps1	12.4303	11.7961	15.6652	0.63421	-3.86905	-3.23484	1.55209	-14.6117	-9.41421
Gm8618	14.9454	14.3104	18.1006	0.63499	-3.79026	-3.15527	1.55293	-13.8351	-8.90904
Gm7312	9.1246	8.4885	11.0917	0.636102	-2.60316	-1.96706	1.55412	-6.07616	-3.9097
Gm23232	5.67522	5.03612	5.91417	0.639096	-0.878051	-0.238955	1.55735	-1.83789	-1.18014
Gm16409	14.7389	14.0973	17.7364	0.6416	-3.63908	-2.99748	1.56006	-12.4587	-7.98604
Gm13503	7.30447	6.6613	7.44885	0.643167	-0.787541	-0.144374	1.56175	-1.72613	-1.10525
Gm3244	6.73337	6.09009	7.54193	0.643283	-1.45184	-0.808557	1.56188	-2.73557	-1.75146
Gm17113	8.10236	7.45757	8.23007	0.644794	-0.772501	-0.127707	1.56352	-1.70823	-1.09256
Gm15779	8.05049	7.40413	9.05436	0.646359	-1.65023	-1.00387	1.56521	-3.13883	-2.00537
Gm22661	10.8144	10.1678	11.1287	0.6466	-0.96085	-0.31425	1.56547	-1.94646	-1.24337
Gm22761	8.10531	7.4573	8.29585	0.648015	-0.838556	-0.190541	1.56701	-1.78826	-1.14119
LOC100861882	7.70637	7.05527	7.84974	0.6511	-0.794473	-0.143373	1.57037	-1.73444	-1.10448
Gm12094	11.1266	10.4719	12.8927	0.65461	-2.42078	-1.76617	1.57419	-5.3546	-3.4015
Gm12943	11.7263	11.0712	14.7966	0.6551	-3.72542	-3.07032	1.57473	-13.2271	-8.3996
Gm9531	13.0049	12.3496	13.659	0.65537	-1.30947	-0.6541	1.57502	-2.4785	-1.57363
Rps15a-ps6	9.01522	8.35883	11.5286	0.65639	-3.16978	-2.51339	1.57613	-8.99909	-5.7096
Gm20568	11.975	11.3177	14.2006	0.65727	-2.88285	-2.22558	1.5771	-7.37606	-4.67699
Gm8069	7.67145	7.01356	8.96941	0.657883	-1.95585	-1.29797	1.57777	-3.87944	-2.45882
Gm2830	12.8164	12.1538	13.0777	0.66263	-0.92386	-0.26123	1.58297	-1.89718	-1.1985
Gm5776	8.26092	7.59496	9.20978	0.665963	-1.61483	-0.948865	1.58663	-3.06275	-1.93035
Rps8-ps1	11.7269	11.0588	16.7487	0.66811	-5.68995	-5.02184	1.58899	-51.6233	-32.4881
Gm10335	13.8485	13.1803	16.9227	0.66819	-3.74237	-3.07418	1.58908	-13.3834	-8.4221
Rpl38-ps1	12.8398	12.1704	15.4545	0.66941	-3.28407	-2.61466	1.59042	-9.741	-6.12479
Gm10087	6.26945	5.59812	7.26772	0.671326	-1.6696	-0.998269	1.59254	-3.18125	-1.9976
Gm20285	7.18258	6.50877	8.08264	0.673802	-1.57386	-0.900061	1.59527	-2.97701	-1.86614
Gm16265	9.87127	9.19675	10.4022	0.674517	-1.2054	-0.530882	1.59606	-2.30601	-1.44481
Gm15483	10.3348	9.65938	14.1401	0.675422	-4.48075	-3.80533	1.59706	-22.3275	-13.9804
Gm5884	9.09317	8.41626	9.37948	0.676908	-0.963224	-0.286316	1.59871	-1.94966	-1.21952
Gm14766	5.26706	4.58887	5.53202	0.678182	-0.943141	-0.264959	1.60012	-1.92271	-1.2016
Rps19-ps3	9.28231	8.60308	10.3638	0.679233	-1.76074	-1.08151	1.60129	-3.38873	-2.11625
Gm22578	7.32997	6.6504	8.45851	0.679572	-1.80812	-1.12854	1.60166	-3.50185	-2.18638
Gm10132	13.2782	12.5977	16.3079	0.68048	-3.71021	-3.02973	1.60267	-13.0883	-8.16657
Gm8290	13.1426	12.4542	16.0789	0.6885	-3.62474	-2.93624	1.61161	-12.3355	-7.65414
Gm6919	10.2118	9.52221	12.7449	0.68959	-3.22274	-2.53315	1.61283	-9.33558	-5.78834
Gm8807	14.1293	13.4381	14.5047	0.69119	-1.06656	-0.37537	1.61461	-2.09443	-1.29717
Gm15148	14.3295	13.6357	16.9703	0.69373	-3.33454	-2.64081	1.61746	-10.0878	-6.23682
Gm5913	8.44278	7.74707	10.0581	0.695704	-2.311	-1.61529	1.61967	-4.96226	-3.06374
Gm25120	6.21847	5.52113	6.97591	0.697332	-1.45478	-0.757448	1.6215	-2.74115	-1.6905
Rps12l1	11.5863	10.8867	12.8765	0.69961	-1.98985	-1.29024	1.62407	-3.97196	-2.44569
Gm10136	14.1723	13.4719	15.8665	0.70043	-2.39461	-1.69418	1.62499	-5.25835	-3.23593
Gm15566	7.47096	6.76914	7.53163	0.701819	-0.762498	-0.060679	1.62655	-1.69643	-1.04296
Gm4987	11.0419	10.3351	13.6918	0.70672	-3.3567	-2.64998	1.63209	-10.2439	-6.27659
Gm12755	11.5547	10.8443	12.1921	0.71045	-1.34786	-0.63741	1.63631	-2.54534	-1.55553
Rps19-ps2	11.1183	10.4055	13.0698	0.71285	-2.66432	-1.95147	1.63904	-6.33928	-3.86768
Rps19-ps1	11.1183	10.4055	13.0698	0.71285	-2.66432	-1.95147	1.63904	-6.33928	-3.86768
Gm12428	10.3218	9.60814	13.0873	0.713654	-3.47919	-2.76554	1.63995	-11.1517	-6.80002
Gm26729	6.75551	6.03558	6.7287	0.719932	-0.693118	0.026814	1.6471	-1.61677	1.01876
Rps19-ps7	9.8154	9.0937	10.4522	0.721701	-1.3585	-0.636797	1.64913	-2.56418	-1.55487
Rpl31-ps5	7.07346	6.35069	8.78208	0.722773	-2.43139	-1.70862	1.65035	-5.39414	-3.26848
Rpsa-ps11	7.52591	6.80253	8.75957	0.723381	-1.95704	-1.23366	1.65105	-3.88264	-2.35162
Gm4943	6.99364	6.26734	7.24593	0.726298	-0.978589	-0.252291	1.65439	-1.97054	-1.1911
Gm10051	12.2848	11.555	15.6934	0.7297	-4.1383	-3.4086	1.65829	-17.6097	-10.6192
Gm14577	6.47631	5.74521	6.39048	0.731093	-0.645261	0.085832	1.6599	-1.56402	1.0613
Gm6134	9.75705	9.02013	14.8208	0.736923	-5.80068	-5.06376	1.66662	-55.7416	-33.4459
LOC100861831	6.26722	5.52749	6.14298	0.739731	-0.615495	0.124236	1.66986	-1.53208	1.08993
Rps24-ps2	11.0635	10.3222	11.2101	0.74131	-0.88782	-0.14651	1.67169	-1.85038	-1.10689
Ighv1-47	5.22248	4.48096	9.06033	0.741522	-4.57937	-3.83785	1.67194	-23.9072	-14.2991
LOC101055953	8.00069	7.25894	8.0732	0.741756	-0.814266	-0.07251	1.67221	-1.7584	-1.05154
Gm2199	9.73502	8.9932	10.4148	0.741827	-1.42156	-0.679737	1.67229	-2.67876	-1.60185
Gm10819	8.23321	7.48902	9.12965	0.744195	-1.64064	-0.896441	1.67504	-3.11803	-1.86147
Gm11223	7.49125	6.74548	8.91159	0.745771	-2.16611	-1.42034	1.67687	-4.48812	-2.67648
Trav6-4	4.7864	4.04023	5.60989	0.746173	-1.56966	-0.823482	1.67734	-2.96834	-1.76967
Gm11878	13.8407	13.0931	14.5253	0.74762	-1.43225	-0.68463	1.67902	-2.69867	-1.60729
Gm23657	6.75606	6.0071	7.00463	0.74896	-0.997529	-0.248569	1.68058	-1.99658	-1.18803
Gm12739	8.11575	7.36489	8.58175	0.750851	-1.21685	-0.466004	1.68279	-2.32439	-1.38128
Gm16303	7.95639	7.2055	9.21373	0.750889	-2.00823	-1.25734	1.68283	-4.02287	-2.39054
Rps6-ps2	9.65273	8.89887	10.7592	0.753868	-1.86029	-1.10642	1.68631	-3.63081	-2.15311
Gm26527	5.83733	5.08226	5.92272	0.755067	-0.84046	-0.085393	1.68771	-1.79062	-1.06098
Gm22729	6.19226	5.43696	6.691	0.755301	-1.25403	-0.498732	1.68798	-2.38507	-1.41297
Gm23493	5.46102	4.70566	5.44353	0.755359	-0.737869	0.01749	1.68805	-1.66771	1.0122
Gm12038	9.27055	8.50957	12.6688	0.760982	-4.15925	-3.39827	1.69464	-17.8673	-10.5434
Rpl21-ps13	13.0514	12.2892	16.9246	0.76223	-4.63543	-3.8732	1.69611	-24.8544	-14.6538
Gm5931	11.3457	10.582	12.5837	0.76373	-2.00169	-1.23796	1.69787	-4.00469	-2.35865
Gm8034	18.5797	17.8117	18.4638	0.76794	-0.65205	0.11589	1.70284	-1.5714	1.08364
Gm12988	7.76591	6.99687	7.62452	0.769042	-0.627657	0.141385	1.70414	-1.54505	1.10296
Gm8842	10.7417	9.97241	12.2015	0.769285	-2.22912	-1.45984	1.70442	-4.6885	-2.75078
Etaa1os	6.74414	5.97259	6.82834	0.771555	-0.855751	-0.084196	1.70711	-1.8097	-1.0601
Gm10443	14.2056	13.4302	16.7528	0.77541	-3.32261	-2.5472	1.71168	-10.0047	-5.84499
Gm14044	14.9326	14.1555	17.5104	0.77706	-3.35489	-2.57783	1.71364	-10.2311	-5.97041
Gm26287	7.76803	6.98964	10.2458	0.778385	-3.25618	-2.47779	1.71521	-9.55448	-5.57045
Rpl36-ps3	10.2978	9.5192	13.7464	0.778577	-4.22718	-3.4486	1.71544	-18.7287	-10.9177
Gm15644	9.40022	8.62163	9.34187	0.778591	-0.720237	0.058354	1.71545	-1.64745	1.04128
Rps2-ps13	9.95396	9.17074	12.8029	0.783223	-3.6322	-2.84898	1.72097	-12.3994	-7.20491
Gm9824	7.6177	6.83409	8.13723	0.783609	-1.30314	-0.519531	1.72143	-2.46765	-1.43349
Gm8840	11.2276	10.4436	13.0798	0.78404	-2.63627	-1.85223	1.72195	-6.21722	-3.61058
Ict1os	4.40039	3.60797	4.47503	0.792417	-0.867063	-0.074646	1.73197	-1.82395	-1.0531
Gm8444	9.04233	8.24983	10.7133	0.792501	-2.46344	-1.67094	1.73207	-5.51532	-3.18423
Gm8177	6.69407	5.90137	7.14211	0.792694	-1.24074	-0.448047	1.73231	-2.3632	-1.36419
Gm9143	9.19743	8.40443	11.0859	0.792999	-2.68149	-1.88849	1.73267	-6.41516	-3.70246
Gm13461	10.3008	9.5067	10.6101	0.794132	-1.10342	-0.30929	1.73403	-2.14864	-1.2391
Gm10073	13.611	12.8123	16.4719	0.79874	-3.65968	-2.86094	1.73958	-12.6379	-7.26489
Gm14747	5.60557	4.80577	5.67367	0.799795	-0.867893	-0.068098	1.74085	-1.825	-1.04833
Gm7857	11.9772	11.1759	13.6352	0.80132	-2.45932	-1.658	1.74269	-5.49957	-3.15579
Gm6382	9.33971	8.53641	10.5983	0.803298	-2.06184	-1.25854	1.74509	-4.17519	-2.39254
Trav14-1	5.52687	4.72306	8.37132	0.80381	-3.64826	-2.84445	1.74571	-12.5382	-7.18233
Gm15583	7.60285	6.79399	8.64515	0.808854	-1.85115	-1.0423	1.75182	-3.60789	-2.05951
Gm5070	10.7105	9.90042	11.796	0.81005	-1.89563	-1.08558	1.75327	-3.72084	-2.12223
Gm4617	18.2947	17.4846	18.2019	0.81008	-0.71727	0.09281	1.75331	-1.64407	1.06645
Gm4879	6.38872	5.57813	9.61246	0.810588	-4.03433	-3.22374	1.75393	-16.3853	-9.34206
Gm23152	10.9082	10.0961	6.32586	0.81207	3.77023	4.5823	1.75573	13.6443	23.9557
Gm3940	13.9628	13.1412	16.8735	0.82157	-3.73233	-2.91076	1.76733	-13.2906	-7.52014
Gm9378	10.2596	9.43752	12.1919	0.822099	-2.75439	-1.93229	1.76798	-6.74767	-3.81661
Gm15381	6.14475	5.32006	7.01647	0.824687	-1.69641	-0.871725	1.77115	-3.24094	-1.82985
Ighv6-7	7.56149	6.73664	7.54903	0.824843	-0.812388	0.012455	1.77134	-1.75612	1.00867
Gm12722	6.49963	5.6709	6.8746	0.82873	-1.20371	-0.374978	1.77612	-2.30331	-1.29682
Gm11813	5.01825	4.18537	4.98777	0.832886	-0.8024	0.030486	1.78125	-1.744	1.02136
Gm6640	5.66997	4.83642	5.75228	0.833547	-0.915853	-0.082306	1.78206	-1.88668	-1.05871
Gm12181	6.45082	5.61684	6.43273	0.83398	-0.815893	0.018087	1.7826	-1.76039	1.01262
Gm26585	12.2587	11.4208	12.3226	0.83792	-0.90178	-0.06386	1.78747	-1.86837	-1.04526
Gm6988	12.0555	11.2159	14.9063	0.83961	-3.69038	-2.85077	1.78957	-12.9097	-7.21385
Gm12540	7.69523	6.85504	8.1043	0.840193	-1.24926	-0.409071	1.79029	-2.3772	-1.32783
Rpl14-ps1	12.121	11.2726	16.6465	0.84848	-5.37392	-4.52544	1.8006	-41.4678	-23.03
Gm13268	13.707	12.8584	15.7034	0.84862	-2.84504	-1.99642	1.80078	-7.18526	-3.99009
5430403G16Rik	7.17007	6.3165	9.64052	0.85357	-3.32401	-2.47044	1.80697	-10.0145	-5.54214
Gm18025	9.87495	9.02136	10.2072	0.853583	-1.18579	-0.332202	1.80698	-2.27487	-1.25893
Gm12855	5.16815	4.31009	4.93052	0.858062	-0.620429	0.237633	1.8126	-1.53733	1.17906
Gm16288	10.3672	9.50479	12.4522	0.862453	-2.9474	-2.08495	1.81813	-7.71359	-4.2426
Rps19-ps5	11.707	10.8411	12.2161	0.86587	-1.37497	-0.5091	1.82244	-2.59363	-1.42316
Rps24-ps3	16.7918	15.9259	17.6653	0.86587	-1.73938	-0.87351	1.82244	-3.33892	-1.83211
Gm6736	8.29219	7.41932	11.5498	0.872871	-4.13045	-3.25758	1.8313	-17.5142	-9.56379
Rpl36a-ps3	13.0223	12.1491	13.8177	0.87318	-1.6686	-0.79542	1.8317	-3.17906	-1.73558
Ighv1-72	6.08123	5.20649	11.4424	0.87474	-6.23589	-5.36115	1.83368	-75.3687	-41.1025
Gm11843	9.15458	8.27464	9.47488	0.879941	-1.20024	-0.320302	1.8403	-2.29778	-1.24859
Rps19-ps4	11.9868	11.1061	12.8251	0.88069	-1.71898	-0.83829	1.84126	-3.29204	-1.78793
Gm17092	6.16007	5.27455	6.5253	0.885514	-1.25075	-0.365234	1.84742	-2.37965	-1.28809
Gm12504	8.32175	7.43484	8.28755	0.886903	-0.852708	0.034195	1.8492	-1.80589	1.02399
Gm5687	10.2538	9.36206	13.4721	0.89171	-4.11005	-3.21834	1.85537	-17.2683	-9.30715
Gm16519	7.3029	6.40738	9.96756	0.895521	-3.56019	-2.66466	1.86028	-11.7957	-6.3408
Gm12474	6.58879	5.69077	8.26972	0.898023	-2.57895	-1.68093	1.86351	-5.97505	-3.20634
Gm11361	12.4777	11.5779	17.1261	0.89975	-5.54818	-4.64843	1.86574	-46.7917	-25.0794
Gm6749	9.05795	8.15621	9.5343	0.901736	-1.37809	-0.476356	1.86831	-2.59924	-1.39123
Gm12618	11.0537	10.1509	14.3877	0.90285	-4.23681	-3.33396	1.86976	-18.8541	-10.0837
Gm27445	6.04998	5.14675	6.38898	0.903236	-1.24223	-0.338997	1.87026	-2.36564	-1.26488
Gm6433	10.7915	9.88738	12.3719	0.904121	-2.48447	-1.58035	1.8714	-5.59629	-2.99042
Gm12935	5.80854	4.89485	6.33454	0.91369	-1.4397	-0.526006	1.88386	-2.71264	-1.43994
Gm13192	13.2276	12.3115	16.1456	0.9161	-3.83414	-2.91804	1.88701	-14.2624	-7.55819
Gm12312	9.27971	8.35408	10.3417	0.925631	-1.9876	-1.06197	1.89951	-3.96578	-2.08778
Gm9883	5.74349	4.8045	5.67514	0.938992	-0.870635	0.068357	1.91719	-1.82847	1.04852
Gm11334	7.23248	6.28691	8.05316	0.945576	-1.76626	-0.82068	1.92596	-3.4017	-1.76624
Gm11893	10.275	9.3282	11.2019	0.946826	-1.87366	-0.92683	1.92763	-3.6646	-1.90109
Rpl21-ps3	13.5088	12.5618	17.6506	0.94696	-5.08876	-4.1418	1.92781	-34.0306	-17.6525
Mrps36-ps2	7.70075	6.74999	7.39754	0.950758	-0.647552	0.303206	1.93289	-1.56651	1.23388
Gm9048	9.63082	8.67648	9.58204	0.954349	-0.905567	0.048782	1.93771	-1.87328	1.03439
Gm13573	11.2735	10.3137	14.4054	0.95974	-4.0917	-3.13196	1.94496	-17.05	-8.76625
Gm11975	12.5932	11.6307	16.2222	0.96244	-4.59144	-3.629	1.9486	-24.108	-12.3719
Gm22757	11.7202	10.7552	12.5844	0.96502	-1.82924	-0.86422	1.95209	-3.5535	-1.82036
Igkv3-4	5.46749	4.5	10.7264	0.967492	-6.22645	-5.25896	1.95544	-74.8771	-38.2917
Gm12632	9.31266	8.34046	10.1938	0.972198	-1.85334	-0.881144	1.96183	-3.61336	-1.84184
Gm10420	12.3756	11.4021	13.9858	0.97352	-2.58371	-1.61019	1.96363	-5.99479	-3.05292
Rps15a-ps3	11.7284	10.7505	15.6163	0.97792	-4.8658	-3.88788	1.96962	-29.1576	-14.8036
Gm5093	7.70212	6.71876	8.51323	0.983354	-1.79447	-0.811117	1.97706	-3.46888	-1.75457
Gm15466	12.5246	11.5392	12.4595	0.98539	-0.92035	0.06504	1.97985	-1.89257	1.04611
Snora30	12.2153	11.2243	12.3393	0.99101	-1.11501	-0.124	1.98758	-2.16597	-1.08975
Gm13342	9.95105	8.94318	11.7268	1.00788	-2.78365	-1.77578	2.01095	-6.88594	-3.42422
Gm22408	5.61652	4.60671	5.27449	1.00981	-0.667779	0.342026	2.01364	-1.58863	1.26754
Rps15-ps2	10.1791	9.16508	12.8482	1.01403	-3.68309	-2.66905	2.01955	-12.8446	-6.3601
Gm21844	5.95357	4.93554	5.75879	1.01803	-0.823247	0.194779	2.02515	-1.76938	1.14455
Ighv5-9	8.48709	7.46409	9.9767	1.023	-2.51262	-1.48962	2.03214	-5.70655	-2.80814
Gm11196	11.1435	10.1186	11.126	1.02496	-1.00748	0.01748	2.0349	-2.0104	1.01219
Gm3873	9.51936	8.4936	10.6464	1.02576	-2.1528	-1.12704	2.03603	-4.44689	-2.1841
Igkv1-132	6.91888	5.89255	8.92792	1.02633	-3.03537	-2.00904	2.03683	-8.19855	-4.02515
Gm12013	14.6429	13.6114	17.4655	1.03145	-3.85406	-2.82261	2.04408	-14.4606	-7.07441
Gm11443	9.66194	8.61757	12.1445	1.04437	-3.52692	-2.48255	2.06247	-11.5268	-5.58883
Gm12138	8.25361	7.20153	10.6935	1.05208	-3.49195	-2.43987	2.07352	-11.2508	-5.42594
Gm21959	8.77974	7.72437	9.84117	1.05537	-2.1168	-1.06142	2.07825	-4.3373	-2.08699
Gm12955	5.72326	4.65841	6.01848	1.06485	-1.36006	-0.295213	2.09195	-2.56697	-1.22707
Gm7363	15.634	14.5684	16.1963	1.0656	-1.6279	-0.5623	2.09304	-3.09063	-1.47662
Rps19-ps10	9.56305	8.48625	10.0851	1.07679	-1.59885	-0.522052	2.10934	-3.02901	-1.436
Gm7984	8.67616	7.59259	8.59535	1.08357	-1.00277	0.08081	2.11928	-2.00384	1.05761
Gm23084	7.23733	6.15055	7.01054	1.08678	-0.859989	0.226792	2.124	-1.81502	1.17023
Gm23169	8.30144	7.21255	8.55117	1.08889	-1.33861	-0.249724	2.1271	-2.52908	-1.18898
Rpl5-ps2	6.89188	5.79869	7.36493	1.09319	-1.56624	-0.473048	2.13345	-2.96131	-1.38804
Rps18-ps1	12.2994	11.2041	16.9192	1.09522	-5.71507	-4.61985	2.13646	-52.53	-24.5874
Gm15067	13.1938	12.0979	15.5011	1.09589	-3.40318	-2.30729	2.13745	-10.5794	-4.94952
Igkv4-60	5.88111	4.78426	9.68536	1.09684	-4.90109	-3.80425	2.13886	-29.8797	-13.9699
Gm8894	6.83607	5.73764	6.42981	1.09843	-0.692169	0.406263	2.14122	-1.61571	1.32525
2210417A02Rik	5.44053	4.33721	5.08785	1.10331	-0.750639	0.352672	2.14847	-1.68254	1.27692
Gm11687	11.9886	10.8792	13.183	1.10946	-2.30383	-1.19437	2.15765	-4.93767	-2.28845
Gm14680	7.28357	6.17175	8.50481	1.11182	-2.33306	-1.22123	2.16118	-5.03872	-2.33146
Ighv1-9	7.23715	6.1153	14.9218	1.12184	-8.80646	-7.68461	2.17625	-447.721	-205.731
Gm8757	12.0826	10.952	12.4513	1.13062	-1.49933	-0.36871	2.18953	-2.82711	-1.2912
Gm10275	14.2104	13.0736	18.906	1.13677	-5.83241	-4.69564	2.19888	-56.981	-25.9136
Gm12922	12.4145	11.2756	12.6077	1.13891	-1.33211	-0.1932	2.20215	-2.51771	-1.1433
Gm11249	13.5424	12.4016	15.3132	1.14076	-2.91161	-1.77085	2.20497	-7.52457	-3.41255
Rps19-ps6	12.2195	11.0703	13.8235	1.14913	-2.75316	-1.60403	2.2178	-6.74192	-3.03991
Gm25870	7.12709	5.97249	6.84426	1.1546	-0.87177	0.282833	2.22623	-1.82991	1.21658
Gm24989	6.16054	5.00295	5.97508	1.15759	-0.972132	0.185459	2.23085	-1.96174	1.13718
Gm14336	14.4315	13.2722	17.5771	1.15933	-4.30492	-3.14559	2.23354	-19.7656	-8.84946
Gm6043	12.4811	11.3211	13.7326	1.15994	-2.41142	-1.25148	2.23448	-5.31998	-2.38086
Gm12842	6.60424	5.42927	7.24949	1.17498	-1.82022	-0.645247	2.25789	-3.53136	-1.56401
Gm11631	11.5384	10.3566	14.493	1.18178	-4.13646	-2.95468	2.26857	-17.5873	-7.7526
Trbv13-2	6.00112	4.8164	13.2266	1.18471	-8.41017	-7.22545	2.27318	-340.182	-149.65
Gm11401	8.04908	6.85651	8.96408	1.19257	-2.10756	-0.914997	2.28559	-4.30963	-1.88557
Gm4883	12.3315	11.1384	14.4304	1.19305	-3.29199	-2.09894	2.28636	-9.79462	-4.28395
Rny1	12.2372	11.0404	12.0793	1.19681	-1.03886	0.15795	2.29232	-2.0546	1.1157
Ighv3-6	5.2455	4.04536	13.2572	1.20014	-9.21184	-8.0117	2.29762	-592.98	-258.085
Gm14046	12.4431	11.2316	14.6584	1.21149	-3.42684	-2.21535	2.31577	-10.7543	-4.64394
Gm8163	5.63694	4.42476	5.03031	1.21218	-0.605548	0.606634	2.31688	-1.52156	1.5227
Gm19807	6.47839	5.25204	6.05852	1.22635	-0.806475	0.41987	2.33973	-1.74893	1.33781
Gm11617	5.66105	4.43333	5.05167	1.22771	-0.618333	0.60938	2.34195	-1.5351	1.5256
Gm9396	13.5364	12.3052	18.5049	1.23121	-6.19964	-4.96843	2.34764	-73.4984	-31.3074
Gm13509	11.1717	9.92094	11.1548	1.25072	-1.23382	0.0169	2.3796	-2.35189	1.01178
Hspe1-ps5	7.46888	6.21597	8.40907	1.25291	-2.1931	-0.940192	2.38321	-4.57286	-1.91878
Gm9800	13.9342	12.6531	15.2357	1.28103	-2.58259	-1.30156	2.43012	-5.99014	-2.46495
Gm15621	11.9994	10.713	13.2671	1.28634	-2.55404	-1.2677	2.43908	-5.87277	-2.40777
Gm6563	9.00312	7.70898	9.63504	1.29414	-1.92606	-0.63192	2.45231	-3.80016	-1.54963
Gm24406	5.48356	4.18721	5.55576	1.29635	-1.36855	-0.072206	2.45606	-2.58211	-1.05132
Ighv8-12	6.56831	5.26364	10.6109	1.30467	-5.34728	-4.04261	2.47027	-40.7091	-16.4796
Gm5786	14.6591	13.3512	16.2139	1.30784	-2.86267	-1.55483	2.47571	-7.2736	-2.93799
Gm12112	11.3427	10.0311	11.2916	1.31165	-1.26049	0.05116	2.48225	-2.39577	1.0361
Gm6285	11.9455	10.6292	16.9502	1.3163	-6.32101	-5.00471	2.49027	-79.9491	-32.1046
LOC100862102	6.03749	4.6974	5.48284	1.34009	-0.785438	0.554648	2.53166	-1.72362	1.46881
Gm14270	10.2566	8.89986	9.92691	1.35677	-1.02706	0.329718	2.56112	-2.03786	1.25677
Gm6505	7.40856	6.03513	9.13447	1.37343	-3.09934	-1.72591	2.59086	-8.57025	-3.30788
Gm16340	12.193	10.7927	11.4037	1.40021	-0.61099	0.78922	2.6394	-1.52731	1.72814
Gm5967	8.01159	6.58251	8.34153	1.42908	-1.75902	-0.329935	2.69275	-3.38467	-1.25696
Gm7123	9.6674	8.22476	12.1911	1.44264	-3.96636	-2.52371	2.71818	-15.6312	-5.75061
Gm24333	6.85446	5.40202	6.12042	1.45244	-0.718393	0.734046	2.7367	-1.64535	1.6633
Gm15720	13.5513	12.0894	13.0091	1.46194	-0.91976	0.54218	2.75479	-1.8918	1.45617
Gm9001	7.31461	5.79603	9.3796	1.51858	-3.58358	-2.065	2.86509	-11.9885	-4.18433
Trav6-5	6.35692	4.83429	8.54479	1.52263	-3.7105	-2.18788	2.87313	-13.091	-4.55634
Spcs2-ps	10.5386	8.96131	9.97819	1.57729	-1.01688	0.560408	2.98409	-2.02354	1.47469
Gm12728	13.5554	11.9626	15.706	1.59275	-3.7434	-2.15065	3.01624	-13.3929	-4.44028
Gm24983	10.7176	9.1036	10.4965	1.61402	-1.39294	0.22108	3.06103	-2.62613	1.16561
Gm5558	12.52	10.9022	15.1536	1.61784	-4.2514	-2.63356	3.06915	-19.0458	-6.20555
Gm13992	8.74399	7.11369	8.16385	1.63029	-1.05015	0.580138	3.09576	-2.07075	1.49499
Gm11579	7.19351	5.55975	6.67089	1.63376	-1.11114	0.522625	3.10321	-2.16016	1.43657
Rny1	12.3924	10.719	12.1465	1.67335	-1.42752	0.24583	3.18954	-2.68984	1.18577
Gm5883	12.4214	10.7225	13.8471	1.6989	-3.12466	-1.42576	3.24653	-8.72201	-2.68656
Gm13750	11.7276	9.9851	13.9898	1.74252	-4.00468	-2.26216	3.34618	-16.0519	-4.79709
E030024N20Rik	11.8051	10.0434	14.6581	1.76165	-4.61462	-2.85297	3.39086	-24.4985	-7.22486
Gm10123	15.8558	14.0702	18.3113	1.78557	-4.241	-2.45543	3.44755	-18.909	-5.48477
Gm5777	11.2115	9.39722	12.0848	1.81427	-2.68756	-0.87329	3.51683	-6.44225	-1.83184
Gm5566	9.16257	7.29168	9.51265	1.87088	-2.22097	-0.350088	3.65756	-4.66207	-1.27464
Gm6065	12.7011	10.7388	14.9161	1.96223	-4.17723	-2.215	3.89664	-18.0914	-4.64282
Gm9234	12.9613	10.9886	15.3687	1.97273	-4.38011	-2.40738	3.9251	-20.8231	-5.3051
Gm6665	7.47614	5.50289	6.15259	1.97325	-0.649691	1.32355	3.9265	-1.56883	2.50282
Gm17622	7.87131	5.62205	7.17536	2.24925	-1.55331	0.695945	4.75437	-2.93489	1.61995
LOC100861638	9.32493	5.50577	6.98076	3.81916	-1.47499	2.34417	14.115	-2.77982	5.07768

## Sheet: Sheet3
Yang et al “Cannabidiol Regulates Gene Expression in Encephalitogenic T cells Using Epigenetic Pathways during Experimental Autoimmune Encephalomyelitis”
altered protein coding genes (fold change >1.5)
Gene Symbol	CBD	MOG	NAÏVE	CBD-MOG	MOG-NAÏVE	CBD-Naïve	Fold change(CBD-MOG)	Fold change(MOG-Naïve)	Fold change(CBD-NAÏVE)
Nos2	5.76481	13.4308	4.63406	-7.66595	8.7967	1.13075	-203.086	444.704	2.18973
Ptgs2	6.7589	13.9311	4.98944	-7.17218	8.94164	1.76947	-144.225	491.703	3.40928
Thbs1	10.9383	17.0385	7.89994	-6.10018	9.13852	3.03834	-68.6021	563.597	8.21546
F13a1	10.7998	15.6639	6.08754	-4.86403	9.57631	4.71228	-29.1218	763.409	26.2143
Gbp2	10.7291	15.3142	9.73449	-4.58516	5.57973	0.99457	-24.0033	47.8262	1.99249
C3	9.30809	13.819	5.80477	-4.51089	8.01421	3.50331	-22.7989	258.533	11.3397
H2-Eb1	9.26721	13.7314	11.8773	-4.46415	1.85401	-2.61014	-22.072	3.61504	-6.10561
H2-Ab1	12.0978	16.4888	15.2907	-4.39097	1.19812	-3.19285	-20.9804	2.2944	-9.14416
Fbxl5	11.67	16.0399	9.74088	-4.36985	6.29899	1.92914	-20.6755	78.7379	3.80827
Apol7c	5.42413	9.5831	8.69479	-4.15897	0.88831	-3.27066	-17.8639	1.85101	-9.6509
Ccl24	9.75608	13.9042	5.57401	-4.14817	8.33024	4.18207	-17.7306	321.849	18.1522
Egln3	6.63396	10.5222	6.93155	-3.88823	3.59064	-0.297588	-14.8072	12.0473	-1.22909
Grina	11.4571	15.0743	9.37171	-3.61719	5.70261	2.08541	-12.2711	52.0781	4.24397
Il1b	5.6073	9.15228	5.25014	-3.54498	3.90215	0.357168	-11.672	14.9508	1.28091
Cacna1d	6.89934	10.4218	7.13329	-3.52246	3.28851	-0.233942	-11.4912	9.77105	-1.17604
Plbd1	6.65661	10.1629	8.1054	-3.50629	2.0575	-1.44879	-11.3632	4.16266	-2.72979
Hcar2	6.73186	10.2113	6.60904	-3.4794	3.60222	0.122812	-11.1533	12.1444	1.08886
Hif1a	12.1744	15.635	11.8162	-3.46064	3.81885	0.35821	-11.0092	14.112	1.28183
Tgm2	9.26457	12.5094	8.64763	-3.24486	3.8618	0.616933	-9.47984	14.5384	1.53361
Gbp2b	7.41056	10.5904	6.96268	-3.17987	3.62775	0.447874	-9.06227	12.3612	1.36403
Ero1l	10.2452	13.4096	8.80727	-3.16434	4.60229	1.43795	-8.96523	24.29	2.70936
Pgk1	11.2046	14.1937	10.6751	-2.98904	3.51863	0.52959	-7.93946	11.4608	1.44352
Nfkbia	10.1832	13.1438	10.0152	-2.96062	3.12861	0.16799	-7.78458	8.74592	1.12349
Nlrp3	7.58196	10.5297	5.26896	-2.94779	5.26079	2.313	-7.71565	38.3403	4.96916
Acpp	6.40348	9.25233	8.08653	-2.84885	1.1658	-1.68305	-7.20427	2.24358	-3.21107
Clec4n	10.4594	13.3069	10.3541	-2.84755	2.95284	0.10529	-7.19777	7.74272	1.07571
Dusp1	9.26544	12.0772	9.20984	-2.81177	2.86737	0.055601	-7.02145	7.29734	1.03929
Gbp4	12.0849	14.8514	11.7988	-2.76644	3.05261	0.28617	-6.80427	8.29712	1.2194
Abca1	7.82087	10.5775	8.52714	-2.75659	2.05032	-0.706277	-6.75799	4.14197	-1.63159
Slc7a11	7.64511	10.4007	6.83884	-2.75555	3.56182	0.806275	-6.7531	11.8091	1.74869
Pdcd1lg2	9.03998	11.7536	6.38132	-2.71359	5.37225	2.65867	-6.5595	41.4199	6.31449
Cxcl2	10.9144	13.6202	5.41065	-2.70578	8.20952	5.50374	-6.5241	296.013	45.3722
Ifngr1	11.22	13.8691	12.7717	-2.64911	1.09746	-1.55165	-6.2728	2.13978	-2.93152
Il12rb2	5.73085	8.32147	5.57271	-2.59062	2.74876	0.158141	-6.02359	6.72141	1.11585
Gsr	11.1813	13.759	9.83068	-2.57769	3.92834	1.35065	-5.96983	15.2247	2.55027
Gbp7	10.0976	12.6606	11.0564	-2.56299	1.60416	-0.95883	-5.90931	3.04019	-1.94373
Snx18	8.43722	10.9632	8.11123	-2.526	2.85199	0.325987	-5.75974	7.21996	1.25352
Egln1	7.45666	9.97284	9.03086	-2.51618	0.941984	-1.5742	-5.72065	1.92117	-2.9777
Tarm1	8.66132	11.1417	5.93851	-2.48034	5.20315	2.72281	-5.58031	36.8387	6.60156
Il4ra	9.93511	12.4015	11.8145	-2.46636	0.58702	-1.87934	-5.52648	1.50214	-3.67907
Ctsc	11.8521	14.3023	11.1563	-2.45017	3.14598	0.69581	-5.4648	8.85186	1.61979
Emb	10.8257	13.2643	11.8931	-2.43853	1.37119	-1.06734	-5.42089	2.58684	-2.09557
Ets2	6.04598	8.47443	6.56023	-2.42845	1.91419	-0.514254	-5.38314	3.76903	-1.42826
Fem1c	8.49342	10.9184	10.1526	-2.42494	0.76573	-1.65921	-5.37007	1.70023	-3.15844
Klra2	6.9177	9.34193	5.23966	-2.42423	4.10228	1.67804	-5.36744	17.1755	3.19993
Clec4a1	9.58513	12.0023	6.607	-2.41722	5.39535	2.97813	-5.34142	42.0885	7.87965
Zfp622	8.31307	10.7123	7.77233	-2.39923	2.93997	0.540746	-5.2752	7.67396	1.45472
Nampt	12.9145	15.3035	9.60586	-2.38893	5.69761	3.30868	-5.23769	51.898	9.90856
Itga1	6.04309	8.43088	5.3726	-2.38779	3.05829	0.670496	-5.23355	8.32982	1.59162
Rcbtb2	8.10927	10.4904	8.17917	-2.38118	2.31128	-0.069906	-5.20964	4.96322	-1.04965
Vegfa	10.1912	12.5544	7.09192	-2.36315	5.46245	3.09929	-5.14492	44.092	8.57
Cd14	8.47937	10.8338	7.21049	-2.35447	3.62335	1.26888	-5.11406	12.3235	2.40974
Picalm	11.8136	14.1388	12.5254	-2.32521	1.61339	-0.71182	-5.01139	3.0597	-1.63787
Csf1r	9.84671	12.1697	8.37991	-2.32298	3.78978	1.46679	-5.00366	13.8305	2.76407
Mefv	7.46337	9.78456	5.18823	-2.32119	4.59633	2.27514	-4.99744	24.1899	4.84046
Eid3	7.73655	10.0576	7.24333	-2.32106	2.81428	0.493221	-4.99698	7.03367	1.40758
Tnip3	6.57799	8.89251	5.59447	-2.31451	3.29804	0.983521	-4.97437	9.83576	1.97729
Irg1	8.37262	10.682	5.11929	-2.30938	5.56271	3.25333	-4.95669	47.2653	9.53564
Serpina3g	6.86178	9.1279	6.56375	-2.26612	2.56414	0.298024	-4.81028	5.91404	1.22946
Gpr141	8.32482	10.5769	5.74052	-2.25203	4.83633	2.58429	-4.76353	28.568	5.99722
Xdh	11.3585	13.574	8.24354	-2.21553	5.33046	3.11493	-4.64452	40.2371	8.66335
Iigp1	9.14316	11.3481	6.85426	-2.20497	4.49387	2.2889	-4.61065	22.5315	4.88684
Gm4951	11.1419	13.3423	6.15609	-2.20036	7.18617	4.98581	-4.59594	145.631	31.6868
Pirb	11.3184	13.4991	9.56509	-2.18062	3.93396	1.75333	-4.53348	15.2841	3.37137
Pla2g7	12.0668	14.2346	8.03768	-2.16779	6.19693	4.02914	-4.49335	73.3604	16.3265
Ly6i	9.18416	11.3483	7.82544	-2.16416	3.52288	1.35872	-4.48207	11.4946	2.56457
Samhd1	13.2658	15.4118	14.4914	-2.14601	0.92044	-1.22557	-4.42602	1.89269	-2.33848
Fam71f2	6.62682	8.75975	6.10636	-2.13292	2.65338	0.520459	-4.38606	6.29141	1.43441
Tnfaip3	9.10211	11.2164	9.73889	-2.11431	1.47753	-0.636779	-4.32984	2.78472	-1.55485
Igsf6	10.9285	13.0381	9.7646	-2.1096	3.27353	1.16393	-4.31572	9.67012	2.24068
Kdm7a	10.1824	12.2839	11.5764	-2.10151	0.7075	-1.39401	-4.29158	1.63297	-2.62808
Pla2g4a	9.55903	11.6604	7.08643	-2.10141	4.574	2.4726	-4.29127	23.8184	5.55043
Slc7a2	9.57204	11.6668	7.28682	-2.09479	4.38001	2.28522	-4.27165	20.8216	4.87437
Fam26f	6.01483	8.09853	6.64498	-2.08369	1.45355	-0.630141	-4.23891	2.73881	-1.54772
Vcan	6.61063	8.6761	4.70146	-2.06547	3.97465	1.90918	-4.1857	15.7213	3.75595
Trf	8.99754	11.0606	9.91261	-2.0631	1.14803	-0.915073	-4.17883	2.21611	-1.88566
Selenbp1	6.90166	8.95529	5.42048	-2.05364	3.53481	1.48118	-4.15151	11.59	2.79176
Inpp5j	5.98384	8.02749	4.93388	-2.04365	3.09361	1.04997	-4.12286	8.53631	2.07048
Cd274	13.7346	15.7649	8.68569	-2.03029	7.07924	5.04895	-4.08487	135.227	33.1044
Mdm2	9.95307	11.962	9.78818	-2.00893	2.17382	0.164894	-4.02483	4.51217	1.12108
Pira1	9.23329	11.2417	9.29553	-2.00839	1.94615	-0.062237	-4.02332	3.85345	-1.04408
Lair1	8.07441	10.0793	7.90371	-2.0049	2.1756	0.170697	-4.01361	4.51773	1.1256
Tmem2	7.62407	9.61525	7.15624	-1.99119	2.45902	0.467832	-3.97564	5.49842	1.38303
Ahr	6.88365	8.86635	7.26708	-1.9827	1.59927	-0.383425	-3.95231	3.0299	-1.30443
Ier3	7.07695	9.05939	4.74177	-1.98244	4.31762	2.33517	-3.95162	19.9404	5.04612
N4bp1	8.28644	10.2588	8.81992	-1.97233	1.43885	-0.533479	-3.92402	2.71105	-1.44742
Ccrl2	6.86146	8.83266	5.53488	-1.97119	3.29778	1.32659	-3.92092	9.83402	2.50809
Ccr5	10.6117	12.5784	6.0613	-1.96672	6.51714	4.55042	-3.90878	91.5914	23.4322
Ifrd1	9.40915	11.3718	9.20015	-1.96263	2.17163	0.208997	-3.89773	4.50533	1.15588
Prelid2	6.4017	8.35801	6.73634	-1.9563	1.62166	-0.334639	-3.88066	3.0773	-1.26106
Rapgef2	7.5118	9.46252	8.33002	-1.95073	1.1325	-0.818226	-3.8657	2.19239	-1.76324
Hilpda	9.56826	11.5049	7.38369	-1.93667	4.12124	2.18457	-3.82822	17.4027	4.54591
Fosl2	8.19438	10.1165	7.22224	-1.92214	2.89428	0.972144	-3.78984	7.43473	1.96175
Tpd52	8.91854	10.8336	8.60837	-1.91508	2.22525	0.310167	-3.77136	4.67592	1.23985
Osm	7.68964	9.60444	6.574	-1.9148	3.03044	1.11564	-3.77062	8.17057	2.16691
Pira6	8.99143	10.9035	8.45	-1.9121	2.45353	0.541438	-3.76355	5.47756	1.45542
F830016B08Rik	9.36456	11.2747	6.34588	-1.91014	4.92882	3.01868	-3.75846	30.4596	8.10426
Pde4b	6.5604	8.46987	7.64817	-1.90948	0.821707	-1.08777	-3.75673	1.7675	-2.12545
Nrg1	6.21527	8.11401	5.29685	-1.89874	2.81716	0.918415	-3.72888	7.04773	1.89004
Tra2a	11.3242	13.1906	11.6979	-1.86633	1.49269	-0.37364	-3.64604	2.81413	-1.29562
Prm1	6.32686	8.17144	5.54665	-1.84458	2.6248	0.780211	-3.5915	6.16797	1.71738
F10	9.67089	11.5045	5.32184	-1.83363	6.18268	4.34905	-3.56434	72.6395	20.3795
Fcgr2b	11.5933	13.4104	9.0473	-1.81709	4.36312	2.54603	-3.5237	20.5793	5.84025
Gm14548	8.79181	10.5961	8.97558	-1.80429	1.62053	-0.183769	-3.49258	3.07487	-1.13585
Tiparp	9.74401	11.547	9.60819	-1.803	1.93882	0.13582	-3.48944	3.83391	1.09872
Cysltr2	6.98626	8.78122	6.66871	-1.79496	2.11251	0.317547	-3.47006	4.32442	1.24621
Pgm2	7.6015	9.39304	7.77023	-1.79154	1.62281	-0.16873	-3.46185	3.07975	-1.12407
Amica1	6.88929	8.67624	6.29943	-1.78695	2.3768	0.589858	-3.45084	5.19385	1.5051
Gbp8	13.0749	14.8523	11.1796	-1.77744	3.67279	1.89535	-3.42817	12.7532	3.72012
Bnip3	7.85856	9.63027	6.80037	-1.77171	2.8299	1.05819	-3.41459	7.11027	2.08232
Man2a1	9.45448	11.2225	10.2918	-1.76803	0.93068	-0.837351	-3.40589	1.90617	-1.78677
Rgs1	10.7613	12.5274	10.6947	-1.76615	1.83272	0.06657	-3.40145	3.56208	1.04722
Rnasel	9.37327	11.136	8.81353	-1.76274	2.32249	0.559748	-3.39341	5.00193	1.47401
Selenbp2	7.11569	8.86328	5.15381	-1.7476	3.70948	1.96188	-3.35799	13.0817	3.8957
Arrdc3	8.28993	10.037	9.39336	-1.74711	0.643684	-1.10342	-3.35685	1.56231	-2.14864
Pdk3	6.50266	8.24872	7.56794	-1.74605	0.680772	-1.06528	-3.3544	1.603	-2.09258
Cd38	10.32	12.0651	10.4284	-1.74508	1.63673	-0.10835	-3.35213	3.1096	-1.07799
Gpd2	7.689	9.40558	8.11845	-1.71659	1.28713	-0.429455	-3.28658	2.44042	-1.34672
Pstpip2	8.43697	10.1409	7.18667	-1.70389	2.95419	1.25029	-3.25779	7.74996	2.3789
Trpm2	6.46747	8.1671	5.66059	-1.69963	2.50652	0.806885	-3.24818	5.68246	1.74943
Tlr8	9.50659	11.2046	8.49695	-1.69797	2.70761	1.00964	-3.24444	6.53237	2.01341
Fcgr3	11.1077	12.8038	9.24443	-1.69616	3.55939	1.86323	-3.24037	11.7892	3.63822
Cybb	13.2264	14.9183	11.6502	-1.69193	3.26813	1.5762	-3.23089	9.63397	2.98183
Nufip1	8.56749	10.2491	8.28809	-1.68157	1.96097	0.27941	-3.20776	3.89325	1.2137
Map4k4	10.0519	11.7258	10.4117	-1.67382	1.31411	-0.35971	-3.19058	2.48649	-1.28317
Casp4	8.92025	10.5916	8.9965	-1.67138	1.59513	-0.076252	-3.18519	3.02121	-1.05428
Mif	9.32498	10.9953	10.3838	-1.67028	0.61145	-1.05884	-3.18277	1.52779	-2.08325
Zeb2	10.37	12.04	7.72591	-1.67004	4.31413	2.64409	-3.18223	19.8922	6.25101
Slc16a3	6.45613	8.1074	5.79533	-1.65127	2.31207	0.660798	-3.14111	4.96596	1.58096
Tma16	6.89881	8.54987	6.85665	-1.65106	1.69321	0.042152	-3.14064	3.23376	1.02965
Adam8	11.4647	13.1142	7.81213	-1.64951	5.30208	3.65257	-3.13727	39.4533	12.5757
Ric1	9.81657	11.4528	9.15279	-1.63628	2.30006	0.663778	-3.10864	4.92479	1.58423
Gbp3	8.57526	10.2058	7.79255	-1.63057	2.41328	0.782716	-3.09635	5.32685	1.72037
Wnk2	7.15403	8.78117	5.30136	-1.62714	3.4798	1.85267	-3.089	11.1564	3.61167
Ccr2	7.02296	8.64838	5.5586	-1.62542	3.08978	1.46436	-3.08532	8.51365	2.7594
Tpi1	10.4198	12.0403	8.74842	-1.62044	3.29186	1.67142	-3.07469	9.79371	3.18527
Pkm	10.5158	12.1353	11.0932	-1.61957	1.04215	-0.57742	-3.07283	2.05929	-1.49218
Mxd1	8.62093	10.2343	8.84845	-1.61335	1.38583	-0.227514	-3.0596	2.61322	-1.17082
Csf3r	8.23826	9.82197	6.43166	-1.58372	3.39031	1.80659	-2.99741	10.4854	3.49815
Il13ra1	9.14939	10.7304	7.31552	-1.58103	3.4149	1.83387	-2.99184	10.6657	3.56493
Pfkfb3	8.07836	9.65814	7.91941	-1.57978	1.73873	0.158947	-2.98925	3.33741	1.11647
Slc2a1	8.71631	10.2897	9.48626	-1.57343	0.803475	-0.769951	-2.97611	1.7453	-1.70521
Parp10	7.66408	9.22242	7.64881	-1.55834	1.5736	0.015269	-2.94514	2.97648	1.01064
Gbp10	13.1151	14.664	10.3823	-1.54887	4.2817	2.73283	-2.92588	19.45	6.64758
H2-DMa	7.54953	9.09676	7.89003	-1.54722	1.20672	-0.340499	-2.92254	2.30813	-1.26619
Mmp14	7.24897	8.7858	5.35296	-1.53684	3.43284	1.896	-2.90158	10.7991	3.7218
Gm5725	5.96619	7.4996	6.27744	-1.53341	1.22216	-0.311246	-2.89469	2.33296	-1.24078
Gm5725	5.96619	7.4996	6.27744	-1.53341	1.22216	-0.311246	-2.89469	2.33296	-1.24078
Sppl2a	10.2885	11.8173	10.3172	-1.52881	1.50016	-0.02865	-2.88548	2.82874	-1.02006
Ccnl1	10.2457	11.7678	10.6563	-1.52209	1.11153	-0.41056	-2.87207	2.16075	-1.3292
Cxcl3	9.07695	10.5843	6.57902	-1.5073	4.00523	2.49793	-2.84277	16.0581	5.64874
Irf1	10.0468	11.5453	9.62246	-1.49847	1.92285	0.424384	-2.82543	3.79172	1.342
Nfil3	8.29385	9.79002	6.55411	-1.49617	3.2359	1.73973	-2.82093	9.42116	3.33974
Cdkn1a	10.2307	11.7229	7.39505	-1.49222	4.32785	2.83563	-2.81322	20.0823	7.13856
C4b	7.3681	8.85088	5.73559	-1.48278	3.1153	1.63252	-2.79486	8.66557	3.10053
Ndrg1	6.80809	8.28798	6.6736	-1.47989	1.61439	0.134493	-2.78928	3.06181	1.09771
Fam102b	7.62466	9.10092	7.69406	-1.47625	1.40686	-0.069397	-2.78225	2.65159	-1.04928
Ifitm2	9.55421	11.03	6.88842	-1.47579	4.14158	2.66579	-2.78135	17.6498	6.34576
Stat1	12.9318	14.4015	12.5963	-1.46963	1.80512	0.33549	-2.76951	3.49458	1.26181
Lacc1	8.48724	9.95563	5.8651	-1.46839	4.09054	2.62215	-2.76713	17.0362	6.15666
Tex14	6.13514	7.594	5.14192	-1.45886	2.45208	0.993217	-2.74891	5.47203	1.99062
Appl2	8.57056	10.0198	8.23017	-1.44923	1.78962	0.340384	-2.73062	3.45723	1.26609
Clec4d	11.199	12.6447	8.20001	-1.44562	4.44464	2.99902	-2.7238	21.7756	7.99456
Tnfaip2	9.27868	10.7157	8.0362	-1.43705	2.67953	1.24248	-2.70766	6.40647	2.36605
Braf	8.61188	10.045	9.03171	-1.43314	1.01331	-0.419827	-2.70033	2.01854	-1.33777
Upp1	6.96745	8.3946	5.76512	-1.42715	2.62948	1.20234	-2.68914	6.18804	2.30112
Il6	7.17899	8.60493	4.35886	-1.42594	4.24607	2.82013	-2.68689	18.9756	7.06228
Tet2	8.357	9.7801	9.04334	-1.4231	0.736764	-0.686332	-2.6816	1.66643	-1.60919
Acsl1	8.09377	9.51328	7.5576	-1.41951	1.95567	0.536164	-2.67495	3.87897	1.45011
Tspan3	7.62448	9.02222	7.93454	-1.39774	1.08769	-0.310058	-2.63489	2.12533	-1.23976
Ccr1	10.7146	12.1019	6.72301	-1.3873	5.37886	3.99156	-2.61589	41.6099	15.9066
Gbp11	12.1998	13.5837	10.0025	-1.38393	3.58121	2.19728	-2.60978	11.9688	4.58614
Olfr689	5.57181	6.94532	4.56689	-1.3735	2.37843	1.00493	-2.59099	5.19969	2.00684
Sdc4	7.62457	8.98407	7.70444	-1.3595	1.27962	-0.079877	-2.56596	2.42776	-1.05693
Fn1	8.42083	9.76556	5.86193	-1.34474	3.90363	2.55889	-2.53984	14.9661	5.89255
Afg3l2	8.38175	9.72643	8.97493	-1.34468	0.7515	-0.593183	-2.53974	1.68354	-1.50857
Pygl	8.24257	9.58619	6.27895	-1.34362	3.30724	1.96362	-2.53787	9.89871	3.9004
Trib1	7.0309	8.36813	5.60772	-1.33722	2.76041	1.42319	-2.52664	6.77588	2.68177
Serpina3f	6.9039	8.2396	5.59925	-1.3357	2.64035	1.30465	-2.52398	6.23485	2.47024
Slpi	7.21218	8.5372	6.20812	-1.32502	2.32908	1.00406	-2.50537	5.02486	2.00564
Phxr1	6.7849	8.09935	6.56112	-1.31445	1.53824	0.223783	-2.48708	2.90439	1.16779
Impa2	6.55052	7.86222	6.67551	-1.3117	1.18671	-0.124987	-2.48233	2.27633	-1.0905
Cers6	9.86262	11.1589	8.27677	-1.29627	2.88212	1.58586	-2.45592	7.37235	3.00186
Ncf2	9.34547	10.6404	8.53157	-1.29497	2.10887	0.813897	-2.45373	4.31354	1.75795
Cxcl16	7.90051	9.18833	7.36123	-1.28782	1.8271	0.539275	-2.44159	3.54823	1.45324
Dock7	7.98956	9.2755	6.69539	-1.28594	2.58011	1.29418	-2.4384	5.97986	2.45237
Hp	8.8159	10.0977	6.79983	-1.28181	3.29788	2.01607	-2.43143	9.83467	4.04481
Il1r2	6.12647	7.40806	4.85407	-1.28159	2.55399	1.2724	-2.43106	5.87256	2.41564
Tas2r135	5.46083	6.73936	5.41855	-1.27853	1.32081	0.042278	-2.42591	2.49805	1.02974
Atg4c	7.4154	8.69327	6.34761	-1.27786	2.34566	1.06779	-2.4248	5.08291	2.09622
Plaur	9.1093	10.3704	7.92802	-1.26106	2.44233	1.18127	-2.39672	5.43521	2.26776
Pfkp	8.11783	9.37614	8.67282	-1.25831	0.703326	-0.554989	-2.39216	1.62825	-1.46916
Plac8	7.79703	9.04384	8.04193	-1.24681	1.00191	-0.244898	-2.37316	2.00265	-1.18501
Retnla	4.81202	6.05771	4.0992	-1.24569	1.9585	0.712819	-2.37131	3.88659	1.639
Alpk1	6.62846	7.87059	5.59515	-1.24213	2.27545	1.03331	-2.36548	4.84148	2.04672
Sik1	7.34891	8.5898	7.56697	-1.2409	1.02283	-0.218069	-2.36346	2.0319	-1.16318
Rab8b	12.3912	13.6308	11.9914	-1.23963	1.63936	0.39973	-2.36138	3.11528	1.31926
Sod2	7.54446	8.78144	7.69418	-1.23699	1.08726	-0.149729	-2.35706	2.1247	-1.10936
Plxdc2	6.1868	7.42279	5.84581	-1.23598	1.57697	0.340991	-2.35542	2.98343	1.26663
Adam30	5.52647	6.76159	5.35432	-1.23512	1.40727	0.172153	-2.354	2.65235	1.12674
Fcgr4	10.3547	11.5838	5.5792	-1.22912	6.00465	4.77553	-2.34424	64.2068	27.3892
Smim3	7.283	8.51155	6.02256	-1.22855	2.48899	1.26044	-2.34331	5.61384	2.39569
Ifitm1	6.41408	7.64239	5.9673	-1.22831	1.67509	0.446771	-2.34293	3.19338	1.36299
Olfr215	5.20896	6.4251	5.19587	-1.21615	1.22923	0.013084	-2.32325	2.34442	1.00911
Clec9a	6.30231	7.51366	5.4913	-1.21136	2.02236	0.811004	-2.31556	4.06249	1.75443
Olfr1160	6.57148	7.7723	5.07535	-1.20082	2.69695	1.49612	-2.2987	6.48427	2.82084
Ccdc58	7.05874	8.25836	7.66039	-1.19963	0.597973	-0.601652	-2.2968	1.51359	-1.51745
Wnk2	6.51817	7.70871	5.08232	-1.19054	2.62639	1.43585	-2.28239	6.17481	2.70542
Cpeb2	7.86735	9.05781	8.20581	-1.19045	0.852	-0.338453	-2.28224	1.805	-1.2644
Atp7a	9.45567	10.6416	8.71518	-1.18592	1.92641	0.740488	-2.27509	3.80108	1.67074
Il13	5.21476	6.3842	4.80519	-1.16944	1.57901	0.40957	-2.24925	2.98765	1.32829
Saa3	8.29107	9.46018	6.20324	-1.16911	3.25695	2.08784	-2.24873	9.55957	4.2511
Gbe1	7.52326	8.69013	7.95031	-1.16688	0.739819	-0.427056	-2.24525	1.66997	-1.34449
Gda	9.8908	11.0495	5.61331	-1.1587	5.43619	4.27749	-2.23256	43.2968	19.3933
Fos	9.14807	10.3001	6.94138	-1.15202	3.35871	2.20669	-2.22225	10.2582	4.61615
Syk	9.40647	10.5564	9.6216	-1.14995	0.934824	-0.215124	-2.21906	1.91166	-1.1608
Tlr4	9.28523	10.4347	7.97273	-1.1495	2.462	1.31249	-2.21838	5.50978	2.4837
Errfi1	6.46913	7.61618	6.94517	-1.14706	0.671011	-0.476046	-2.21462	1.59219	-1.39093
Hbegf	6.6728	7.81354	4.62933	-1.14074	3.18421	2.04347	-2.20495	9.08956	4.12235
Gvin1	12.2704	13.4088	10.2462	-1.13842	3.16259	2.02417	-2.2014	8.95436	4.06758
Ripk3	9.01261	10.1488	7.28145	-1.13624	2.8674	1.73116	-2.19808	7.2975	3.31994
Sp140	10.533	11.6657	10.1849	-1.13268	1.48081	0.34813	-2.19266	2.79105	1.27291
Cltc	12.8485	13.9753	12.6938	-1.12676	1.28147	0.15471	-2.18368	2.43087	1.1132
Trafd1	10.2905	11.4141	8.70032	-1.12369	2.71383	1.59014	-2.17904	6.56061	3.01079
Fam209	7.22225	8.34587	7.44419	-1.12362	0.901674	-0.221949	-2.17893	1.86823	-1.16631
Gm4201	6.57177	7.69527	6.29778	-1.1235	1.39749	0.273986	-2.17875	2.63442	1.20914
Gm4201	6.57177	7.69527	6.29778	-1.1235	1.39749	0.273986	-2.17875	2.63442	1.20914
Gbp9	12.2285	13.3497	11.7179	-1.12112	1.63179	0.51067	-2.17516	3.09897	1.42471
Arrb1	9.16486	10.282	9.64646	-1.11714	0.635544	-0.481597	-2.16917	1.55352	-1.39629
Arg2	8.68703	9.80339	5.97433	-1.11636	3.82906	2.7127	-2.168	14.2122	6.55547
Slc22a4	7.31323	8.42442	6.27148	-1.11119	2.15294	1.04175	-2.16024	4.44734	2.05873
Luc7l2	10.595	11.7058	10.6953	-1.11082	1.01049	-0.10033	-2.15968	2.0146	-1.07202
Lilra6	8.65434	9.76421	8.06325	-1.10987	1.70096	0.591097	-2.15826	3.25118	1.50639
Ly86	11.8716	12.9811	11.908	-1.10947	1.07302	-0.03645	-2.15766	2.10383	-1.02559
Tm6sf1	8.76378	9.86583	8.51342	-1.10205	1.3524	0.250357	-2.14659	2.55337	1.1895
Clec4a3	11.0225	12.1237	7.68872	-1.1012	4.43502	3.33382	-2.14533	21.6308	10.0827
Ipmk	7.90563	9.00304	8.13387	-1.09741	0.869162	-0.228247	-2.1397	1.8266	-1.17141
Dock4	8.27793	9.36917	7.00747	-1.09124	2.3617	1.27046	-2.13057	5.13975	2.41238
Gys1	7.21681	8.30643	6.94457	-1.08962	1.36186	0.272238	-2.12818	2.57017	1.20768
Tgfbi	11.5176	12.6008	7.00108	-1.08317	5.5997	4.51652	-2.11869	48.4927	22.8881
Glrx	8.97226	10.0519	8.4962	-1.07967	1.55573	0.476059	-2.11356	2.93983	1.39094
Olfr478	4.92723	6.00303	4.22433	-1.0758	1.7787	0.702892	-2.1079	3.43116	1.62776
Pim3	7.41535	8.47244	6.9094	-1.05709	1.56304	0.505952	-2.08073	2.95477	1.42006
Gm10228	5.99989	7.0548	5.99859	-1.05491	1.0562	0.001298	-2.07758	2.07945	1.0009
Gab1	7.20288	8.25625	5.14779	-1.05337	3.10847	2.0551	-2.07537	8.62465	4.15571
Atp2b1	11.1331	12.1799	10.718	-1.04674	1.46188	0.41514	-2.06586	2.75467	1.33343
Plgrkt	9.47275	10.5192	9.81198	-1.04641	0.707178	-0.339234	-2.06539	1.63261	-1.26508
App	10.9753	12.0186	9.00468	-1.04324	3.01388	1.97064	-2.06085	8.07732	3.91941
Clec4e	7.46647	8.50184	5.0719	-1.03538	3.42994	2.39456	-2.04965	10.7774	5.25817
Clic5	6.79536	7.82554	5.31215	-1.03018	2.51338	1.4832	-2.04228	5.70957	2.79569
Hk2	9.2471	10.2745	6.34666	-1.02739	3.92783	2.90044	-2.03833	15.2193	7.46655
Il18bp	8.72596	9.74759	7.89909	-1.02163	1.8485	0.826872	-2.03021	3.60125	1.77384
Smox	6.82355	7.84333	6.67681	-1.01979	1.16652	0.146735	-2.02762	2.2447	1.10706
Nipa2	8.10873	9.12814	8.49936	-1.01942	0.62878	-0.390638	-2.0271	1.54626	-1.31097
Prdm1	7.15398	8.16833	7.38939	-1.01436	0.778942	-0.235415	-2.02	1.71587	-1.17725
P4ha1	10.1682	11.1593	8.97641	-0.99113	2.18289	1.19176	-1.98774	4.54062	2.28431
Gm10408	6.45304	7.44173	6.83476	-0.988689	0.606975	-0.381714	-1.98438	1.52306	-1.30289
Rabgef1	8.34041	9.32601	8.56952	-0.985604	0.756491	-0.229113	-1.98014	1.68938	-1.17211
Pfkl	8.6058	9.58801	8.17955	-0.982206	1.40846	0.426252	-1.97548	2.65453	1.34374
Gm6902	7.07871	8.06051	6.97175	-0.981798	1.08876	0.106958	-1.97493	2.12691	1.07696
Smpdl3b	5.42071	6.4015	5.21217	-0.98079	1.18933	0.208541	-1.97355	2.28047	1.15552
Gm10408	6.70886	7.67019	7.01355	-0.96133	0.656642	-0.304688	-1.9471	1.57641	-1.23515
Parp9	8.0916	9.05252	7.74527	-0.960922	1.30725	0.346325	-1.94655	2.47469	1.27132
Kctd12	8.39414	9.35382	8.52741	-0.959675	0.826408	-0.133267	-1.94487	1.77326	-1.09677
P2ry14	6.80708	7.76391	5.99618	-0.95683	1.76773	0.810898	-1.94104	3.40517	1.7543
Gm16367	5.80593	6.75934	5.69775	-0.953405	1.06158	0.108177	-1.93644	2.08722	1.07787
Piga	7.32386	8.27638	7.06738	-0.952515	1.209	0.256482	-1.93524	2.31177	1.19456
Aldoa	10.3734	11.3232	10.4375	-0.94978	0.8857	-0.06408	-1.93158	1.84766	-1.04542
Tnfrsf9	6.28658	7.23352	5.96002	-0.946943	1.2735	0.326553	-1.92778	2.41747	1.25401
Gpr151	4.99535	5.93916	5.23019	-0.943806	0.70897	-0.234836	-1.9236	1.63464	-1.17677
Svil	7.90389	8.84492	7.97848	-0.941029	0.866443	-0.074586	-1.9199	1.82316	-1.05306
Gsap	9.05776	9.99873	9.16695	-0.940973	0.831776	-0.109197	-1.91982	1.77988	-1.07863
Ltb4r1	6.81826	7.75562	4.83922	-0.937353	2.9164	1.97905	-1.91501	7.54961	3.94233
Raf1	10.0591	10.9941	10.3175	-0.93499	0.67653	-0.25846	-1.91188	1.59829	-1.1962
Npepps	9.45581	10.3873	8.96549	-0.931461	1.42178	0.490317	-1.90721	2.67915	1.40475
Tnfrsf14	9.31792	10.2467	9.62775	-0.928768	0.618945	-0.309823	-1.90365	1.53575	-1.23956
Rras	8.14052	9.06688	8.25846	-0.926362	0.808418	-0.117944	-1.90048	1.75129	-1.08519
Cfb	9.05665	9.98225	5.96643	-0.925592	4.01581	3.09022	-1.89946	16.1763	8.51626
Nlrc5	9.06788	9.98695	8.71919	-0.919069	1.26776	0.348689	-1.89089	2.40787	1.2734
Mfsd7a	8.12518	9.04175	5.85098	-0.916575	3.19078	2.2742	-1.88763	9.13103	4.8373
Arl5a	10.1088	11.0185	10.0998	-0.90971	0.91867	0.00896	-1.87867	1.89037	1.00623
Ctsh	12.4482	13.3515	11.1034	-0.90331	2.24805	1.34474	-1.87035	4.7504	2.53984
Ist1	9.56047	10.462	9.66432	-0.901524	0.797665	-0.103859	-1.86804	1.73829	-1.07464
S100a11	12.6144	13.4979	12.6495	-0.8835	0.84835	-0.03515	-1.84485	1.80044	-1.02466
Aph1c	7.58072	8.46137	7.18412	-0.880644	1.27724	0.396599	-1.8412	2.42375	1.3164
Vav3	9.41023	10.2907	8.42901	-0.880497	1.86172	0.981222	-1.84101	3.6344	1.97414
Gm10354	6.81688	7.69391	5.95441	-0.877032	1.7395	0.862467	-1.83659	3.33919	1.81814
Tlr6	6.97641	7.85335	6.71155	-0.876943	1.14181	0.264866	-1.83648	2.20658	1.20152
Nuak2	7.81469	8.6908	7.70391	-0.876104	0.986889	0.110785	-1.83541	1.98191	1.07982
Trim25	11.5153	12.3895	10.1724	-0.87424	2.21711	1.34287	-1.83304	4.64961	2.53655
Crybg3	7.42702	8.29894	7.59358	-0.871926	0.705361	-0.166565	-1.8301	1.63055	-1.12238
Fgl2	9.37163	10.2411	5.61438	-0.869516	4.62677	3.75725	-1.82705	24.7056	13.5221
Fnip1	10.6271	11.4951	9.97731	-0.86802	1.51782	0.649798	-1.82516	2.86358	1.56895
Vmn1r91	6.46897	7.33391	6.52573	-0.864942	0.808176	-0.056766	-1.82127	1.751	-1.04013
Gm16367	5.8609	6.72514	6.06733	-0.864237	0.657808	-0.206429	-1.82038	1.57768	-1.15383
Gm16367	5.8609	6.72514	6.06733	-0.864237	0.657808	-0.206429	-1.82038	1.57768	-1.15383
Gm16367	5.8609	6.72514	6.06733	-0.864237	0.657808	-0.206429	-1.82038	1.57768	-1.15383
Vmp1	9.30138	10.1608	9.06527	-0.859433	1.09554	0.236112	-1.81433	2.13694	1.17781
Tbxas1	9.76385	10.6211	7.38069	-0.857253	3.24041	2.38316	-1.81159	9.45061	5.21676
Gm16367	5.96491	6.82069	6.16207	-0.85578	0.658622	-0.197158	-1.80974	1.57857	-1.14644
Pld1	7.49954	8.35528	5.62726	-0.855742	2.72802	1.87228	-1.80969	6.62545	3.6611
Mcpt8	5.86807	6.7227	5.18555	-0.854628	1.53715	0.68252	-1.80829	2.9022	1.60494
Stxbp3	12.3792	13.2328	10.7961	-0.85367	2.43675	1.58308	-1.80709	5.41421	2.99609
Lyst	11.0366	11.8814	10.8366	-0.84482	1.04482	0.2	-1.79604	2.06311	1.1487
Plcb1	7.28645	8.13036	4.93421	-0.843912	3.19615	2.35223	-1.79491	9.16507	5.10614
Hba-a2	7.8694	8.70698	7.07459	-0.837581	1.63239	0.794807	-1.78705	3.10026	1.73485
Olfr286	4.71691	5.55438	4.52051	-0.837474	1.03387	0.196394	-1.78692	2.04751	1.14583
Gk	6.41764	7.25311	6.62842	-0.835464	0.62469	-0.210774	-1.78443	1.54188	-1.15731
Itgam	11.7335	12.5669	6.81133	-0.83337	5.75556	4.92219	-1.78184	54.0253	30.3199
Hba-a2	7.87156	8.70448	7.07637	-0.832923	1.62811	0.795192	-1.78129	3.09109	1.73531
Il12rb1	6.38173	7.21334	5.62545	-0.831611	1.58789	0.756275	-1.77967	3.00609	1.68912
Csf2rb	10.0449	10.8761	8.23146	-0.83114	2.64462	1.81348	-1.77909	6.2533	3.51488
Vmn1r115	7.42469	8.24583	7.41403	-0.82114	0.831806	0.010666	-1.7668	1.77991	1.00742
Fcer1g	11.8354	12.6565	9.12416	-0.82108	3.5323	2.71122	-1.76673	11.5698	6.54873
Il18rap	7.14453	7.96522	6.8763	-0.820686	1.08892	0.268235	-1.76625	2.12715	1.20433
Hnrnpll	10.273	11.0917	8.89113	-0.81872	2.20055	1.38183	-1.76384	4.59655	2.60599
Tfec	11.2971	12.1155	5.63573	-0.81842	6.47981	5.66139	-1.76347	89.2519	50.6114
Rhou	6.47247	7.29009	5.19585	-0.817629	2.09425	1.27662	-1.76251	4.27003	2.4227
Mettl6	8.33413	9.15136	8.22968	-0.817234	0.921681	0.104447	-1.76202	1.89432	1.07508
Fmnl2	9.84325	10.6528	7.89086	-0.809573	2.76196	1.95238	-1.75269	6.78315	3.87013
Olfr298	5.713	6.52199	5.02048	-0.808993	1.50151	0.692513	-1.75199	2.83138	1.6161
Mospd2	8.09927	8.90744	7.9104	-0.808168	0.997034	0.188866	-1.75099	1.99589	1.13987
Olfr108	5.98185	6.78339	5.32392	-0.801542	1.45947	0.65793	-1.74296	2.75008	1.57782
Gm13139	9.06142	9.85884	8.43595	-0.797416	1.42288	0.625469	-1.73799	2.68121	1.54271
Clcn5	7.07644	7.87297	6.50542	-0.79653	1.36755	0.571021	-1.73692	2.58032	1.48557
Pik3r6	7.28416	8.07453	6.06298	-0.790376	2.01155	1.22118	-1.72953	4.03216	2.33137
Clic4	9.58547	10.3744	8.30917	-0.788899	2.0652	1.2763	-1.72776	4.18491	2.42216
Adam9	10.2126	10.9976	8.60439	-0.78494	2.39316	1.60822	-1.72302	5.25305	3.04875
Clec4a2	7.25993	8.04464	6.45199	-0.784706	1.59265	0.807943	-1.72274	3.01603	1.75071
Apol8	6.42367	7.20687	5.75795	-0.783198	1.44892	0.665724	-1.72094	2.73004	1.58636
Ehd1	7.13114	7.91194	6.77332	-0.780793	1.13862	0.357823	-1.71807	2.2017	1.28149
Apaf1	8.77868	9.55514	8.66354	-0.776461	0.891603	0.115142	-1.71292	1.85524	1.08308
Osbpl11	9.5427	10.3173	9.46363	-0.774565	0.853632	0.079067	-1.71067	1.80704	1.05633
Olfr1131	5.42083	6.19021	4.86764	-0.769381	1.32257	0.553191	-1.70454	2.50112	1.46733
Ripk1	8.42521	9.19334	8.46682	-0.768123	0.726519	-0.041604	-1.70305	1.65464	-1.02926
Agtrap	7.24946	8.01662	7.09506	-0.767167	0.921563	0.154396	-1.70192	1.89417	1.11296
Gm14851	6.37523	7.1394	5.90836	-0.764163	1.23104	0.466878	-1.69838	2.34736	1.38212
Themis2	9.96643	10.73	9.08015	-0.763582	1.64986	0.886281	-1.6977	3.13804	1.84841
Hlx	7.99171	8.75385	6.81049	-0.762138	1.94335	1.18121	-1.696	3.84598	2.26768
Zc3h7a	10.0546	10.8165	9.80141	-0.76188	1.01507	0.253188	-1.6957	2.021	1.19184
Casp1	10.8107	11.5693	10.3742	-0.75863	1.19512	0.43649	-1.69188	2.28964	1.35331
Cyp11a1	5.23065	5.9878	4.65054	-0.757153	1.33726	0.580105	-1.69015	2.52671	1.49496
Dram1	9.58574	10.3394	7.394	-0.753683	2.94542	2.19174	-1.68609	7.70301	4.56856
Dennd1a	10.8841	11.6316	9.40303	-0.74751	2.22859	1.48108	-1.67889	4.68675	2.79157
Zcchc2	10.1578	10.9044	9.76555	-0.74662	1.13887	0.392248	-1.67786	2.20208	1.31244
Zyx	8.62538	9.37083	7.9096	-0.74545	1.46123	0.715778	-1.6765	2.75343	1.64237
Plekhn1	7.38952	8.12634	6.70883	-0.736826	1.41751	0.680682	-1.66651	2.67124	1.6029
B230217C12Rik	5.21914	5.95434	4.68412	-0.735202	1.27022	0.535017	-1.66463	2.41198	1.44896
Ube2q2	9.20548	9.93986	9.14786	-0.734385	0.792004	0.057619	-1.66369	1.73148	1.04075
Defa2	5.92379	6.65316	5.76068	-0.729369	0.892476	0.163107	-1.65791	1.85636	1.1197
B4galt6	9.61462	10.3427	6.54454	-0.728087	3.79817	3.07008	-1.65644	13.9112	8.39822
Olfml2b	5.53275	6.25373	4.61401	-0.720979	1.63973	0.918746	-1.6483	3.11606	1.89047
Sort1	9.30668	10.0273	8.58774	-0.720616	1.43956	0.718945	-1.64789	2.71238	1.64598
Paxbp1	9.81862	10.5345	9.64707	-0.715886	0.887436	0.17155	-1.64249	1.84989	1.12627
Gm5150	6.55104	7.26192	5.95258	-0.710881	1.30934	0.598455	-1.6368	2.47827	1.51409
Pde1b	7.97285	8.68227	7.63966	-0.709419	1.04261	0.333196	-1.63515	2.05996	1.2598
Olfr1045	5.36814	6.07736	4.17996	-0.709217	1.8974	1.18818	-1.63492	3.72541	2.27866
Mgst1	8.77667	9.4823	7.22885	-0.705631	2.25344	1.54781	-1.63086	4.76819	2.92373
Clec4a4	7.23484	7.94043	5.9393	-0.705595	2.00113	1.29554	-1.63082	4.00315	2.45469
Asb11	6.14562	6.85048	4.90687	-0.704858	1.94361	1.23875	-1.62998	3.84667	2.35994
Olfr344	5.35588	6.05987	4.3757	-0.703991	1.68417	0.980177	-1.629	3.21355	1.97271
Tex2	8.18545	8.88627	8.00816	-0.700813	0.878102	0.177289	-1.62542	1.83796	1.13076
Adora2b	5.47399	6.17254	4.56873	-0.698551	1.60381	0.90526	-1.62287	3.03945	1.87288
Il15ra	7.28644	7.98402	6.64865	-0.697571	1.33536	0.637793	-1.62177	2.52339	1.55595
Olfr538	5.5462	6.24215	5.48175	-0.695952	0.760406	0.064454	-1.61995	1.69397	1.04569
Sestd1	9.69881	10.3925	7.07904	-0.693647	3.31342	2.61978	-1.61737	9.94123	6.14655
C4a	6.50672	7.19956	5.31389	-0.692845	1.88568	1.19283	-1.61647	3.69527	2.28601
Prdx5	8.76838	9.45509	7.90018	-0.686719	1.55491	0.868195	-1.60962	2.93816	1.82538
Zeb2os	7.18948	7.87148	5.49283	-0.681996	2.37865	1.69665	-1.60436	5.2005	3.24149
Rnf149	9.33747	10.0179	8.6134	-0.680418	1.40449	0.724072	-1.6026	2.64724	1.65184
Ifih1	9.25031	9.92912	7.43434	-0.678812	2.49478	1.81597	-1.60082	5.63644	3.52097
Hbb-bs	8.54065	9.21929	7.9116	-0.678645	1.30769	0.629047	-1.60064	2.47545	1.54654
Rassf4	8.17001	8.84289	7.89822	-0.672875	0.944669	0.271794	-1.59425	1.92475	1.20731
Schip1	5.93113	6.60092	5.38023	-0.669791	1.22069	0.550896	-1.59084	2.33058	1.465
2410141K09Rik	5.38537	6.05396	4.73092	-0.668598	1.32305	0.654449	-1.58953	2.50194	1.57401
Defa-rs1	6.37734	7.04243	6.06906	-0.665089	0.973376	0.308287	-1.58567	1.96343	1.23824
Apol10b	5.93319	6.59811	5.85173	-0.664918	0.746375	0.081457	-1.58548	1.67757	1.05809
Gm15308	6.2169	6.88086	6.19186	-0.663959	0.688999	0.02504	-1.58442	1.61216	1.01751
Olfr64	5.11034	5.77412	4.78876	-0.663786	0.985358	0.321572	-1.58423	1.9798	1.24969
Rbm47	7.99964	8.66099	6.94329	-0.661346	1.7177	1.05635	-1.58156	3.28911	2.07966
Dhx38	8.27598	8.93548	8.34019	-0.659499	0.595285	-0.064214	-1.57953	1.51077	-1.04552
Ankrd37	6.44215	7.10162	6.31555	-0.65947	0.786073	0.126603	-1.5795	1.72437	1.09172
Mitf	8.91231	9.5712	6.71087	-0.658893	2.86033	2.20144	-1.57887	7.26183	4.59938
Tlr13	8.19497	8.85372	7.632	-0.658751	1.22172	0.56297	-1.57872	2.33225	1.47731
Olfr502	5.27919	5.93496	4.69135	-0.655766	1.24361	0.587844	-1.57545	2.3679	1.503
Etv5	6.02734	6.68283	5.60257	-0.655487	1.08026	0.424769	-1.57515	2.11441	1.34236
Vmn1r159	7.43675	8.09093	7.30065	-0.654184	0.790277	0.136093	-1.57373	1.72941	1.09893
Scarf1	7.37233	8.02517	6.18355	-0.652832	1.84161	1.18878	-1.57225	3.58411	2.2796
Gm17019	7.69198	8.34263	6.73303	-0.65065	1.6096	0.958947	-1.56988	3.05167	1.94389
Riok3	10.8113	11.4603	10.6105	-0.649	0.84981	0.20081	-1.56808	1.80226	1.14934
Atrnl1	9.58404	10.2304	7.924	-0.64632	2.30636	1.66004	-1.56517	4.94633	3.16025
Olfr874	4.49425	5.13895	4.0655	-0.644704	1.07345	0.428749	-1.56342	2.10446	1.34607
Vmn1r57	6.29695	6.94142	5.51391	-0.644464	1.4275	0.783036	-1.56316	2.6898	1.72075
Rbms1	9.90788	10.5515	9.66424	-0.643641	0.887284	0.243643	-1.56227	1.84969	1.18398
Gm7257	5.56529	6.20669	5.61255	-0.641398	0.594144	-0.047254	-1.55984	1.50958	-1.0333
Gab2	9.19317	9.82844	6.68141	-0.635266	3.14703	2.51176	-1.55322	8.85829	5.70317
Gm14850	6.88112	7.51567	5.79073	-0.634556	1.72494	1.09039	-1.55246	3.30568	2.12931
Nos1ap	6.33004	6.96447	5.59478	-0.634427	1.36968	0.735258	-1.55232	2.58414	1.6647
Tmem87b	9.66504	10.2987	9.05622	-0.633681	1.2425	0.608819	-1.55152	2.36608	1.52501
Olfr319	5.2811	5.9147	4.52428	-0.633602	1.39043	0.756825	-1.55143	2.62156	1.68977
Fgd4	8.70113	9.33352	6.59806	-0.632392	2.73546	2.10307	-1.55013	6.65972	4.29622
Gm20594	13.2213	13.8502	13.0982	-0.62894	0.752	0.12306	-1.54643	1.68413	1.08904
Clip2	7.70812	8.33606	6.92278	-0.627932	1.41328	0.785346	-1.54535	2.66342	1.72351
Vmn2r82	5.04455	5.66955	4.4952	-0.625004	1.17435	0.549348	-1.54222	2.25691	1.46342
Vmn1r112	7.71621	8.33792	7.33455	-0.621704	1.00336	0.381659	-1.53869	2.00467	1.30284
Prss35	6.59611	7.21732	6.48573	-0.621212	0.731591	0.110379	-1.53817	1.66047	1.07951
Lrrk1	6.75809	7.37873	6.76602	-0.620639	0.612715	-0.007924	-1.53756	1.52913	-1.00551
Vmn1r157	7.64391	8.26398	7.12765	-0.620062	1.13632	0.516258	-1.53694	2.1982	1.43024
Vmn1r155	5.83269	6.4497	5.65082	-0.61701	0.798883	0.181873	-1.53369	1.73975	1.13436
Sbno2	8.39417	9.00956	7.74724	-0.615386	1.26232	0.646931	-1.53197	2.39881	1.56583
Ms4a8a	7.34624	7.96054	5.47467	-0.614294	2.48586	1.87157	-1.53081	5.6017	3.65931
Rps6kc1	6.99292	7.60649	6.31028	-0.613566	1.29621	0.682641	-1.53004	2.45582	1.60508
Frmd4b	8.74314	9.35601	7.44731	-0.612876	1.9087	1.29582	-1.5293	3.75471	2.45517
Nxn	6.97077	7.58086	6.48651	-0.610096	1.09435	0.484251	-1.52636	2.13516	1.39886
Atp11a	7.82525	8.43458	7.80846	-0.609335	0.626129	0.016794	-1.52556	1.54342	1.01171
Olfr1126	5.78992	6.39687	5.08349	-0.606946	1.31337	0.706425	-1.52303	2.48522	1.63176
Olfr1112	4.52133	5.12679	3.76481	-0.605464	1.36198	0.756516	-1.52147	2.57038	1.68941
Adssl1	9.09407	9.69761	7.68703	-0.603538	2.01058	1.40704	-1.51944	4.02945	2.65193
Arg1	18.0845	18.6878	6.42593	-0.60326	12.2618	11.6586	-1.51915	4911.06	3232.78
Olfr229	5.53163	6.13282	3.86629	-0.60119	2.26653	1.66534	-1.51697	4.81164	3.17188
Gnaq	9.486	10.0847	8.57529	-0.598708	1.50942	0.910716	-1.51436	2.84696	1.87998
Vmn1r100	7.87296	8.4708	7.49012	-0.59783	0.980677	0.382847	-1.51344	1.97339	1.30391
Csf2rb2	10.6188	11.2165	8.51037	-0.59766	2.70613	2.10848	-1.51326	6.52571	4.31235
Tas2r143	6.02433	6.62178	5.44259	-0.597449	1.17919	0.581739	-1.51304	2.26449	1.49665
Cxcl5	6.24829	6.84466	5.95683	-0.596367	0.887832	0.291465	-1.5119	1.85039	1.22388
Nr4a2	6.20938	6.80393	5.58579	-0.594553	1.21814	0.623589	-1.51	2.32647	1.5407
Vmn1r183	6.02022	6.61223	5.65645	-0.592011	0.955787	0.363776	-1.50735	1.93964	1.28679
Irgm1	10.6148	11.2062	9.14657	-0.59139	2.0596	1.46821	-1.5067	4.1687	2.76678
Krtap22-2	5.2056	5.7961	4.97818	-0.590495	0.817917	0.227422	-1.50576	1.76286	1.17074
Pstpip1	9.79356	10.3807	9.46177	-0.587168	0.918959	0.331791	-1.50229	1.89075	1.25857
Gm11937	5.04476	5.63139	4.96787	-0.586629	0.66352	0.076891	-1.50173	1.58394	1.05474
2010109A12Rik	5.15249	4.56444	5.38037	0.588046	-0.815923	-0.227877	1.50321	-1.76042	-1.17111
Ftsj3	7.39677	6.802	8.60417	0.59477	-1.80217	-1.2074	1.51023	-3.48744	-2.30921
B3galnt2	6.81573	6.21886	8.84813	0.596873	-2.62927	-2.0324	1.51243	-6.18714	-4.09085
Igf2r	8.69918	8.0882	9.3106	0.610989	-1.2224	-0.611414	1.52731	-2.33335	-1.52776
Haus1	6.90368	6.2884	7.6542	0.615278	-1.3658	-0.750523	1.53185	-2.57719	-1.6824
Polr3k	7.11975	6.50299	7.75549	0.616752	-1.25249	-0.635742	1.53342	-2.38253	-1.55374
Srm	6.28525	5.666	7.17496	0.619257	-1.50897	-0.88971	1.53608	-2.84606	-1.8528
Rpl10a	8.71991	8.09835	11.7186	0.621553	-3.62026	-2.9987	1.53853	-12.2972	-7.99281
Znhit6	7.68264	7.05614	7.67828	0.626496	-0.622139	0.004357	1.54381	-1.53916	1.00302
Snrpd3	9.67683	9.04957	10.2416	0.627265	-1.192	-0.564738	1.54463	-2.2847	-1.47912
Ctso	7.94684	7.31645	9.13082	0.630384	-1.81437	-1.18399	1.54798	-3.51707	-2.27204
Mak16	9.22532	8.59394	10.5391	0.631387	-1.94512	-1.31374	1.54905	-3.85071	-2.48584
Rps29	12.0648	11.4329	14.4372	0.63199	-3.00432	-2.37233	1.5497	-8.02399	-5.17777
Hist1h2ac	6.44634	5.81178	6.77358	0.634561	-0.961801	-0.32724	1.55247	-1.94774	-1.25461
Noc2l	8.60144	7.96686	8.99612	0.634571	-1.02925	-0.394681	1.55248	-2.04097	-1.31465
Clic1	9.84306	9.19833	10.2449	0.644734	-1.04662	-0.401891	1.56345	-2.06569	-1.32124
Bloc1s1	7.33249	6.68439	9.19306	0.648101	-2.50867	-1.86057	1.5671	-5.69097	-3.63152
Naf1	7.22473	6.57426	7.86787	0.650476	-1.29361	-0.643138	1.56969	-2.45141	-1.56172
Rps15	9.97186	9.31967	11.8281	0.652187	-2.50844	-1.85625	1.57155	-5.69004	-3.62066
Swi5	8.1677	7.5072	8.35496	0.660494	-0.847757	-0.187263	1.58062	-1.7997	-1.1386
Pld3	9.49195	8.82405	10.2461	0.667903	-1.42202	-0.754118	1.58876	-2.67961	-1.6866
Fkbp4	7.36615	6.69029	8.37912	0.675862	-1.68883	-1.01297	1.59755	-3.22396	-2.01806
Kctd12b	6.06209	5.38057	6.45425	0.681526	-1.07368	-0.392159	1.60384	-2.1048	-1.31236
Rala	7.33582	6.65203	7.77811	0.683788	-1.12607	-0.442283	1.60635	-2.18264	-1.35875
Set	9.6428	8.9527	10.3255	0.690103	-1.37283	-0.682728	1.6134	-2.58978	-1.60517
Rpl23a	11.8956	11.2017	12.7701	0.69391	-1.56837	-0.87446	1.61766	-2.96569	-1.83332
Tmem126b	6.92516	6.22966	8.1525	0.695501	-1.92284	-1.22734	1.61945	-3.79168	-2.34134
Rpl39	11.6383	10.9419	13.3838	0.69641	-2.4419	-1.74549	1.62047	-5.43357	-3.35309
Hax1	8.31275	7.6136	8.45869	0.699149	-0.845088	-0.145939	1.62355	-1.79637	-1.10645
Hist1h2bh	5.44919	4.74852	5.70625	0.700666	-0.957722	-0.257056	1.62525	-1.94224	-1.19504
Aldh18a1	6.7358	6.03218	7.80615	0.70362	-1.77397	-1.07035	1.62859	-3.41993	-2.09994
Gna12	8.47998	7.76691	9.10192	0.713075	-1.33501	-0.621937	1.63929	-2.52278	-1.53894
Rpl14	12.5612	11.8262	15.6928	0.73504	-3.86668	-3.13164	1.66444	-14.5877	-8.76431
Cetn3	8.15099	7.41346	8.10684	0.737528	-0.693383	0.044145	1.66732	-1.61707	1.03107
Idh2	8.26908	7.53073	8.17066	0.738345	-0.63993	0.098415	1.66826	-1.55825	1.0706
Dnaja3	8.0942	7.35278	8.32887	0.741417	-0.976081	-0.234664	1.67182	-1.96711	-1.17663
Eef1e1	8.61198	7.86936	9.58502	0.742619	-1.71566	-0.973039	1.67321	-3.28446	-1.96297
Hist1h4m	7.4383	6.68116	8.57849	0.757135	-1.89733	-1.14019	1.69013	-3.72522	-2.2041
Ltv1	7.93712	7.17517	7.79603	0.761956	-0.620869	0.141087	1.69579	-1.5378	1.10274
Timp2	8.31552	7.5535	9.06249	0.762018	-1.50899	-0.746969	1.69586	-2.8461	-1.67826
Sep9	8.93873	8.1765	9.6314	0.762225	-1.4549	-0.692671	1.6961	-2.74137	-1.61627
Arhgap24	6.73931	5.97478	6.57566	0.764532	-0.600879	0.163653	1.69882	-1.51664	1.12012
Tusc2	6.9301	6.14816	6.96991	0.781938	-0.82175	-0.039812	1.71944	-1.76755	-1.02798
Cbr1	6.73221	5.95016	7.66577	0.782053	-1.71561	-0.933556	1.71958	-3.28435	-1.90998
Srfbp1	8.39237	7.60989	8.52377	0.782483	-0.913876	-0.131393	1.72009	-1.8841	-1.09535
Slc25a24	8.67602	7.88561	9.20695	0.790414	-1.32134	-0.530927	1.72957	-2.49898	-1.44486
Eif3c	11.2756	10.4815	12.1846	0.79411	-1.70306	-0.90895	1.73401	-3.25591	-1.87768
Por	9.27405	8.47954	9.0668	0.794507	-0.587254	0.207253	1.73448	-1.50238	1.15449
Mfhas1	7.24904	6.44846	7.47115	0.800583	-1.02269	-0.222105	1.7418	-2.0317	-1.16643
Rexo2	8.92431	8.11639	9.79909	0.807914	-1.6827	-0.874782	1.75068	-3.21027	-1.83373
Msn	13.1053	12.294	15.5252	0.81132	-3.23119	-2.41987	1.75482	-9.39042	-5.35123
Minpp1	7.57595	6.76281	8.4688	0.813137	-1.70599	-0.892854	1.75703	-3.26253	-1.85685
Ceacam1	7.1727	6.34953	8.12891	0.82317	-1.77938	-0.95621	1.76929	-3.43279	-1.94021
Plp2	7.97122	7.13215	9.832	0.839073	-2.69985	-1.86078	1.7889	-6.49735	-3.63203
Yae1d1	6.54676	5.70575	7.91544	0.841014	-2.20969	-1.36868	1.79131	-4.62576	-2.58233
Pa2g4	9.40533	8.54789	11.2519	0.857441	-2.70401	-1.84657	1.81182	-6.51609	-3.59643
Nudt7	5.268	4.40667	5.40904	0.861335	-1.00238	-0.141042	1.81672	-2.0033	-1.1027
Ifi27l2a	9.12773	8.25491	8.86613	0.872817	-0.611222	0.261595	1.83124	-1.52755	1.1988
Ly9	9.46078	8.5822	10.8906	0.878583	-2.30836	-1.42978	1.83857	-4.95321	-2.69406
Sepw1	9.2287	8.34479	8.9817	0.883907	-0.636907	0.247	1.84537	-1.55499	1.18674
Sars	9.76189	8.87277	10.1676	0.889119	-1.29479	-0.405667	1.85204	-2.45341	-1.3247
Hist1h2ab	6.20342	5.30169	7.71427	0.90173	-2.41258	-1.51085	1.86831	-5.32425	-2.84977
Hist1h2bk	6.54522	5.64318	6.75997	0.902044	-1.11679	-0.214746	1.86871	-2.16864	-1.1605
Tgfbr2	9.59128	8.68212	13.1483	0.909164	-4.46622	-3.55706	1.87796	-22.1038	-11.7701
Hist1h3c	5.99532	5.07749	6.0255	0.917834	-0.948016	-0.030182	1.88928	-1.92922	-1.02114
Syne1	7.54637	6.6284	9.82423	0.917969	-3.19583	-2.27786	1.88945	-9.16303	-4.84957
Glrx5	8.09403	7.17127	8.56114	0.922759	-1.38987	-0.46711	1.89574	-2.62055	-1.38234
Olfr1094	4.97773	4.04816	4.74225	0.929567	-0.694086	0.235481	1.9047	-1.61786	1.1773
Nars	11.2353	10.3007	10.9679	0.93468	-0.66721	0.26747	1.91147	-1.588	1.2037
St13	10.2662	9.32572	10.7325	0.94045	-1.40682	-0.46637	1.91913	-2.65152	-1.38163
Hspe1	9.00518	8.05656	8.9343	0.948615	-0.877741	0.070874	1.93002	-1.8375	1.05035
Rab7	11.8558	10.9039	12.7531	0.95183	-1.84921	-0.89738	1.93432	-3.60303	-1.86268
Sgcb	8.56958	7.61232	8.30399	0.957259	-0.691669	0.26559	1.94162	-1.61515	1.20213
Rpf2	8.31997	7.35351	8.38349	0.966459	-1.02998	-0.063519	1.95404	-2.04199	-1.04501
Axl	8.02021	7.0495	8.89412	0.970705	-1.84461	-0.873909	1.9598	-3.59157	-1.83262
Cacybp	9.28516	8.31154	9.77324	0.973624	-1.4617	-0.488078	1.96377	-2.75433	-1.40258
Nme1	7.48448	6.47202	7.43503	1.01246	-0.963002	0.049453	2.01734	-1.94936	1.03487
Cnpy2	8.84572	7.80594	8.74222	1.03978	-0.936284	0.103495	2.05591	-1.91359	1.07437
Ddost	10.6039	9.56138	10.8255	1.0425	-1.26416	-0.22166	2.0598	-2.40188	-1.16607
Dnajc15	11.1612	10.1081	11.4597	1.0531	-1.35155	-0.29845	2.07498	-2.55186	-1.22982
Ybx3	9.04598	7.95006	8.86861	1.09591	-0.918544	0.17737	2.13748	-1.89021	1.13082
Prkaa1	9.10069	8.00392	11.1583	1.09676	-3.15433	-2.05757	2.13874	-8.90323	-4.16283
Rheb	11.1517	10.0519	10.886	1.09977	-0.83402	0.26575	2.14321	-1.78265	1.20226
Cd200	7.58438	6.47706	7.66045	1.10731	-1.18338	-0.076067	2.15444	-2.27108	-1.05414
Ptma	16.8902	15.7754	16.6107	1.11479	-0.8353	0.27949	2.16563	-1.78423	1.21377
Hpgds	8.38033	7.25563	9.11011	1.12471	-1.85448	-0.729772	2.18057	-3.61621	-1.65838
Fkbp3	9.50258	8.35831	11.058	1.14427	-2.69965	-1.55538	2.21034	-6.49645	-2.93912
Myo1e	9.75663	8.60623	10.3684	1.1504	-1.76214	-0.611741	2.21976	-3.39202	-1.5281
Nme2	9.25977	8.10544	8.69274	1.15433	-0.5873	0.567032	2.22581	-1.50243	1.48147
Hist1h4d	7.49098	6.32996	10.7728	1.16102	-4.4428	-3.28178	2.23615	-21.7478	-9.72554
Blnk	6.7777	5.61228	10.0565	1.16542	-4.44419	-3.27877	2.24299	-21.7688	-9.70529
Nrp1	9.06182	7.89581	10.1204	1.16602	-2.2246	-1.05859	2.24391	-4.67383	-2.08289
Alcam	8.04313	6.86704	9.84911	1.17609	-2.98207	-1.80598	2.25963	-7.90118	-3.49667
Hist1h4n	7.04766	5.87075	8.75473	1.17691	-2.88398	-1.70706	2.26092	-7.38182	-3.26496
Bcar3	9.13678	7.95371	9.16574	1.18307	-1.21203	-0.028955	2.2706	-2.31663	-1.02027
Tceb2	11.124	9.91214	11.9849	1.21186	-2.0728	-0.86094	2.31636	-4.20702	-1.81622
Hn1l	7.83295	6.58038	8.41771	1.25257	-1.83733	-0.584757	2.38266	-3.57348	-1.49979
Bhlhe41	7.6686	6.4141	7.55464	1.2545	-1.14054	0.113963	2.38585	-2.20463	1.0822
Dolk	6.8678	5.60594	7.08186	1.26186	-1.47592	-0.214058	2.39805	-2.78161	-1.15995
Hist1h4f	7.04182	5.77831	6.81433	1.26351	-1.03602	0.227485	2.40079	-2.05057	1.17079
Pno1	8.87171	7.58423	8.69539	1.28748	-1.11117	0.176315	2.44102	-2.1602	1.12999
Ostc	10.8232	9.51461	10.9832	1.30863	-1.46862	-0.15999	2.47706	-2.76756	-1.11728
Adi1	8.37227	7.04979	8.37168	1.32248	-1.32189	0.000585	2.50095	-2.49994	1.00041
Sep15	11.2616	9.9041	11.0833	1.35749	-1.17922	0.17827	2.56239	-2.26454	1.13153
Itga6	8.88095	7.5001	10.6006	1.38085	-3.10054	-1.71969	2.60421	-8.57737	-3.29365
Cotl1	10.8636	9.47922	10.6254	1.38434	-1.14615	0.23819	2.61052	-2.21322	1.17951
Ppib	12.1387	10.735	12.1361	1.40365	-1.40109	0.00256	2.6457	-2.64101	1.00178
Sptssa	9.03756	7.62574	9.01627	1.41182	-1.39053	0.021292	2.66073	-2.62175	1.01487
Ncoa4	11.3141	9.79543	10.5874	1.51864	-0.791928	0.72671	2.8652	-1.73139	1.65486
Hspa9	11.2674	9.71723	10.8148	1.55021	-1.09756	0.45265	2.9286	-2.13993	1.36855
Enpp1	8.74657	7.1236	8.1669	1.62297	-1.0433	0.579667	3.08008	-2.06094	1.4945
Ipo5	9.06748	7.37829	9.53089	1.68919	-2.1526	-0.463403	3.22476	-4.44627	-1.37879
Cd9	10.6874	8.9809	9.90099	1.70648	-0.920094	0.78639	3.26364	-1.89224	1.72475
Spcs2	10.8717	9.13701	10.3418	1.73472	-1.20483	0.52989	3.32814	-2.3051	1.44382
Il1rl2	8.68871	6.94717	9.0585	1.74154	-2.11133	-0.369791	3.34392	-4.32089	-1.29217
Bcl2a1d	9.37965	7.61761	8.70494	1.76204	-1.08733	0.674708	3.39176	-2.1248	1.59627
Lipa	14.2729	12.479	14.3527	1.79387	-1.87369	-0.07982	3.46744	-3.66469	-1.05689
Bcap31	12.8827	11.0447	12.1798	1.83809	-1.13515	0.70294	3.57536	-2.19641	1.62782
Kbtbd7	7.45902	5.56571	8.1448	1.89331	-2.57909	-0.685778	3.71486	-5.97561	-1.60857
Rpn1	12.0532	10.0974	10.8035	1.95583	-0.70614	1.24969	3.87939	-1.63143	2.3779
Igf1	9.5096	7.23721	9.60185	2.27239	-2.36463	-0.092244	4.83122	-5.15022	-1.06603
Atp6v0a1	10.0872	7.66727	10.57	2.41998	-2.90277	-0.48279	5.35162	-7.47859	-1.39744
Pparg	8.91684	5.93007	7.02733	2.98677	-1.09725	1.88951	7.92695	-2.13947	3.7051
Mmp12	10.7454	7.70014	9.36249	3.04528	-1.66235	1.38293	8.25506	-3.16531	2.60798
Lpl	10.7558	7.01777	9.57356	3.73804	-2.5558	1.18225	13.3433	-5.87992	2.2693

## Sheet: Sheet5
Yang et al “Cannabidiol Regulates Gene Expression in Encephalitogenic T cells Using Epigenetic Pathways during Experimental Autoimmune Encephalomyelitis”
altered microRNA (Fold chagne >1.5)
Transcript ID	CBD	MOG	NAÏVE	CBD-MOG	MOG-NAĻVE	CBD-NAĻVE	FC(CBD-MOG)	FC(MOG-NAĻVE)	FC(CBD-NAĻVE)
mmu-let-7e-5p	3.23114	6.2916	4.88733	-3.06046	1.40427	-1.65618	-8.34237	2.64685	-3.15182
mmu-miR-126a-3p	4.07839	7.02183	4.87461	-2.94344	2.14722	-0.796218	-7.69242	4.42973	-1.73654
mmu-miR-3472	3.36981	5.31218	4.12808	-1.94237	1.1841	-0.758273	-3.84337	2.27222	-1.69146
mmu-miR-7662-5p	0.593072	2.51791	1.12505	-1.92484	1.39286	-0.531977	-3.79694	2.62599	-1.44591
mmu-miR-451a	4.30103	6.12193	3.55548	-1.82089	2.56644	0.745549	-3.533	5.92347	1.67661
mmu-miR-6977-5p	3.22766	4.99365	3.99683	-1.76599	0.996816	-0.769176	-3.40108	1.99559	-1.7043
mmu-miR-125a-5p	2.08169	3.82132	2.98602	-1.73964	0.835304	-0.904335	-3.33952	1.78423	-1.87168
mmu-miR-1903	1.66166	3.39548	1.27295	-1.73382	2.12253	0.388714	-3.32607	4.35457	1.30923
mmu-miR-212-3p	1.6186	3.32252	1.43105	-1.70392	1.89147	0.187551	-3.25785	3.71013	1.13883
mmu-miR-200c-3p	3.92079	5.55467	4.30103	-1.63387	1.25364	-0.38024	-3.10345	2.38441	-1.30156
mmu-miR-7119-5p	1.89546	3.46695	1.89546	-1.57149	1.57149	0	-2.97212	2.97212	1
mmu-miR-31-5p	5.88271	7.43997	4.62583	-1.55726	2.81413	1.25688	-2.94294	7.03297	2.38978
mmu-miR-486-5p	6.43146	7.96772	3.7527	-1.53626	4.21502	2.67876	-2.90042	18.5715	6.40303
mmu-miR-3107-5p	6.43146	7.96772	3.7527	-1.53626	4.21502	2.67876	-2.90042	18.5715	6.40303
mmu-miR-6912-5p	3.79975	5.20871	3.79975	-1.40896	1.40896	0	-2.65546	2.65546	1
mmu-miR-5131	1.60767	2.9714	1.9729	-1.36373	0.998507	-0.365223	-2.5735	1.99793	-1.28808
mmu-miR-155-5p	8.00641	9.35609	8.65941	-1.34968	0.696681	-0.652998	-2.54855	1.62077	-1.57243
mmu-miR-326-5p	5.22537	6.51614	5.75496	-1.29078	0.761186	-0.529592	-2.4466	1.69488	-1.44352
mmu-miR-339-5p	2.65565	3.9376	3.2781	-1.28195	0.659502	-0.622449	-2.43168	1.57954	-1.53949
mmu-miR-182-5p	3.99369	5.26063	2.11719	-1.26694	3.14343	1.8765	-2.4065	8.83624	3.67182
mmu-miR-34b-5p	1.23783	2.50474	0.369923	-1.26691	2.13481	0.867905	-2.40645	4.3918	1.82501
mmu-miR-10a-5p	4.33903	5.57499	1.92474	-1.23595	3.65024	2.41429	-2.35537	12.5555	5.33058
mmu-miR-6927-5p	1.43083	2.64449	1.9729	-1.21367	0.671596	-0.542073	-2.31927	1.59283	-1.45606
mmu-miR-511-5p	1.05884	2.2618	1.23783	-1.20296	1.02397	-0.178984	-2.30211	2.03351	-1.13209
mmu-miR-376b-5p	1.05884	2.26068	1.23783	-1.20184	1.02286	-0.178984	-2.30033	2.03194	-1.13209
mmu-miR-6244	4.32041	5.49401	4.82459	-1.1736	0.669419	-0.504179	-2.25574	1.59043	-1.41832
mmu-miR-6378	3.79975	4.94929	3.79975	-1.14954	1.14954	0	-2.21843	2.21843	1
mmu-miR-1893	4.36165	5.46851	4.75511	-1.10686	0.713405	-0.393458	-2.15377	1.63967	-1.31354
mmu-miR-7075-5p	3.81552	4.91829	2.26068	-1.10278	2.65761	1.55483	-2.14768	6.30986	2.938
mmu-miR-223-3p	4.36812	5.45952	2.85927	-1.09139	2.60025	1.50885	-2.1308	6.0639	2.84583
mmu-miR-8096	1.45607	2.51791	1.45607	-1.06184	1.06184	0	-2.08759	2.08759	1
mmu-miR-200b-5p	2.26068	3.32252	1.05884	-1.06184	2.26368	1.20184	-2.08759	4.80214	2.30033
mmu-miR-6958-5p	1.60376	2.64449	1.9729	-1.04073	0.671596	-0.369138	-2.05727	1.59283	-1.29158
mmu-miR-212-5p	1.6186	2.64449	1.39155	-1.02589	1.25294	0.227051	-2.03622	2.38327	1.17044
mmu-miR-6979-5p	2.26068	3.24014	1.73491	-0.979457	1.50523	0.52577	-1.97172	2.83869	1.4397
mmu-miR-296-5p	3.36981	4.34902	1.42538	-0.97921	2.92364	1.94443	-1.97139	7.58758	3.84885
mmu-miR-19a-5p	1.23783	2.21511	1.23783	-0.977282	0.977282	0	-1.96875	1.96875	1
mmu-miR-688	1.2834	2.26068	0.784972	-0.977282	1.47571	0.49843	-1.96875	2.78121	1.41268
mmu-miR-1957a	1.92247	2.88944	1.73491	-0.966973	1.15452	0.187551	-1.95473	2.22611	1.13883
mmu-miR-7024-5p	4.06906	5.00012	2.33363	-0.931061	2.66649	1.73542	-1.90668	6.3488	3.32977
mmu-miR-7045-3p	5.85129	6.7638	1.80478	-0.912506	4.95902	4.04651	-1.88231	31.1038	16.5243
mmu-miR-450a-2-3p	0.890183	1.7799	0.890183	-0.889719	0.889719	0	-1.85282	1.85282	1
mmu-miR-6408	1.05884	1.90942	1.23783	-0.85058	0.671596	-0.178984	-1.80323	1.59283	-1.13209
mmu-miR-202-5p	2.56561	3.40644	2.56561	-0.840826	0.840826	0	-1.79108	1.79108	1
mmu-miR-8113	3.6878	4.52533	3.79975	-0.837529	0.725587	-0.111942	-1.78699	1.65357	-1.08068
mmu-miR-743b-3p	1.05884	1.89415	1.05884	-0.835304	0.835304	0	-1.78423	1.78423	1
mmu-miR-6963-5p	2.93534	3.75779	2.39729	-0.822452	1.36051	0.538053	-1.76841	2.56775	1.45201
mmu-let-7d-5p	9.71409	10.5282	9.69465	-0.81407	0.833507	0.019437	-1.75816	1.78201	1.01356
mmu-miR-7034-5p	3.58933	4.39499	3.04436	-0.805667	1.35063	0.54496	-1.74795	2.55023	1.45898
mmu-miR-125a-3p	1.73491	2.53065	1.73491	-0.795734	0.795734	0	-1.73596	1.73596	1
mmu-miR-338-3p	1.44994	2.24567	0.890183	-0.795734	1.35549	0.559758	-1.73596	2.55884	1.47402
mmu-miR-8111	1.6186	2.41434	0.890183	-0.795734	1.52415	0.728419	-1.73596	2.87618	1.65682
mmu-miR-669b-3p	1.42538	2.20944	1.02638	-0.784059	1.18306	0.399003	-1.72197	2.27058	1.3186
mmu-miR-210-3p	10.8667	11.6437	3.42742	-0.77699	8.21629	7.4393	-1.71355	297.405	173.561
mmu-miR-7052-5p	7.0914	7.86627	5.0374	-0.774867	2.82887	2.054	-1.71103	7.10516	4.15256
mmu-miR-1947-3p	1.54668	2.31226	1.23783	-0.765581	1.07443	0.308848	-1.70005	2.10589	1.23872
mmu-miR-330-5p	0.890183	1.65572	0.741126	-0.765539	0.914596	0.149057	-1.70001	1.88504	1.10884
mmu-miR-6929-5p	1.36063	2.08169	1.36063	-0.721058	0.721058	0	-1.64839	1.64839	1
mmu-miR-3471	2.20024	2.90807	1.66504	-0.707829	1.24303	0.535196	-1.63334	2.36694	1.44914
mmu-miR-344e-5p	2.26068	2.95699	1.73491	-0.696305	1.22208	0.52577	-1.62035	2.33282	1.4397
mmu-miR-344h-5p	2.26068	2.95699	1.73491	-0.696305	1.22208	0.52577	-1.62035	2.33282	1.4397
mmu-miR-5103	0.890183	1.5849	0.890183	-0.694716	0.694716	0	-1.61857	1.61857	1
mmu-miR-6971-3p	1.23783	1.92675	1.23783	-0.688921	0.688921	0	-1.61208	1.61208	1
mmu-miR-1955-5p	1.05884	1.74777	1.05884	-0.688921	0.688921	0	-1.61208	1.61208	1
mmu-miR-6989-5p	2.64449	3.32252	2.58735	-0.678027	0.735172	0.057145	-1.59995	1.6646	1.0404
mmu-miR-5621-5p	3.36981	4.0414	3.05858	-0.671596	0.98282	0.311224	-1.59283	1.97632	1.24076
mmu-miR-7030-5p	6.45931	7.12587	3.12939	-0.66656	3.99649	3.32993	-1.58728	15.9611	10.0556
mmu-miR-24-3p	10.1468	10.8092	9.63284	-0.66241	1.17639	0.513983	-1.58272	2.26011	1.42799
mmu-miR-3544-5p	2.86226	3.48175	1.0042	-0.619486	2.47755	1.85807	-1.53633	5.56952	3.62522
mmu-miR-6975-5p	3.70387	4.32099	3.5706	-0.617122	0.750386	0.133264	-1.53381	1.68224	1.09677
mmu-miR-7064-5p	1.6186	2.21503	1.05884	-0.596428	1.15619	0.559758	-1.51197	2.22867	1.47402
mmu-miR-149-5p	4.22817	4.82459	2.26068	-0.596427	2.56391	1.96748	-1.51197	5.91308	3.91085
mmu-miR-501-3p	6.71367	7.30685	4.71546	-0.593172	2.59138	1.99821	-1.50856	6.02677	3.99505
mmu-miR-6899-5p	2.08169	2.66899	1.42538	-0.587308	1.24361	0.656307	-1.50244	2.36791	1.57604
mmu-miR-29a-3p	10.4962	9.89381	11.0255	0.602379	-1.1317	-0.52932	1.51822	-2.19117	-1.44325
mmu-miR-19b-3p	9.619	9.01209	10.4197	0.606913	-1.40764	-0.800728	1.523	-2.65303	-1.74198
mmu-miR-6240	9.60548	8.98702	10.3803	0.618463	-1.39323	-0.774766	1.53524	-2.62666	-1.71091
mmu-miR-7116-5p	9.31088	8.64025	9.26363	0.670626	-0.623375	0.047251	1.59176	-1.54047	1.03329
mmu-miR-874-3p	3.21247	2.53669	4.68215	0.675785	-2.14547	-1.46968	1.59747	-4.42435	-2.76961
mmu-miR-6988-5p	4.81186	4.12277	5.78143	0.689089	-1.65866	-0.969573	1.61227	-3.15724	-1.95826
mmu-miR-6908-5p	5.29778	4.60155	5.96802	0.696224	-1.36647	-0.670244	1.62026	-2.57839	-1.59134
mmu-miR-7222-3p	3.70387	2.99687	4.13381	0.706994	-1.13693	-0.42994	1.6324	-2.19913	-1.34718
mmu-miR-1843b-5p	2.70402	1.99702	4.75511	0.706995	-2.75808	-2.05109	1.6324	-6.76497	-4.14419
mmu-miR-7678-5p	1.6186	0.900857	1.6186	0.717745	-0.717745	0	1.64461	-1.64461	1
mmu-miR-6998-3p	1.16763	0.442361	1.05884	0.725271	-0.616483	0.108788	1.65321	-1.53313	1.07832
mmu-miR-1964-5p	1.42538	0.659841	2.26068	0.765539	-1.60084	-0.835305	1.7	-3.03321	-1.78423
mmu-miR-6394	4.80752	4.04194	5.11559	0.765581	-1.07364	-0.308063	1.70005	-2.10474	-1.23804
mmu-miR-5119	5.62457	4.80752	5.75783	0.817045	-0.950304	-0.133259	1.76179	-1.93228	-1.09677
mmu-miR-19a-3p	6.80493	5.97734	6.55625	0.827588	-0.578915	0.248673	1.77472	-1.49373	1.18811
mmu-miR-101b-3p	2.26068	1.42407	4.03171	0.836617	-2.60764	-1.77102	1.78586	-6.09505	-3.41296
mmu-miR-181c-5p	3.10151	2.26068	4.45665	0.840825	-2.19596	-1.35514	1.79107	-4.58196	-2.55822
mmu-miR-483-5p	5.00012	4.12932	4.68215	0.870795	-0.55283	0.317965	1.82867	-1.46696	1.24657
mmu-miR-6366	10.2861	9.3791	10.0471	0.906966	-0.668026	0.23894	1.8751	-1.5889	1.18013
mmu-miR-211-3p	10.4065	9.30249	10.1531	1.10402	-0.85064	0.25338	2.14953	-1.8033	1.192
mmu-miR-7050-5p	5.36932	4.23899	4.95432	1.13033	-0.715328	0.415002	2.18909	-1.64186	1.3333
mmu-miR-3102-5p.2-5p	6.00755	4.8117	6.30065	1.19586	-1.48895	-0.293093	2.29081	-2.80685	-1.22526
mmu-miR-6907-5p	4.00909	2.40266	3.23992	1.60643	-0.837256	0.769176	3.04498	-1.78665	1.7043
